1 Emilie Aubin <sup>a+</sup>, Christel Llauro <sup>ab+</sup>, Joseph Garrigue <sup>c</sup>, Marie Mirouze <sup>ad</sup>, Olivier  
2 Panaud <sup>ae\*</sup>, Moaine El Baidouri <sup>ab\*</sup>

3 **Genome-Wide Analysis of Horizontal Transfer in Non-Model Wild**  
4 **Species from a Natural Ecosystem Reveals New Insights into Genetic**  
5 **Exchange in Plants.**

6 a. Université de Perpignan Via Domitia, Laboratoire Génome et Développement des Plantes,  
7 UMR5096, 66860 Perpignan, France

8 b. Centre National de la Recherche Scientifique, Laboratoire Génome et Développement des  
9 Plantes, UMR5096, 66860 Perpignan, France

10 c. Réserve Naturelle Nationale de la forêt de la Massane, France

11 d. IRD, UMR232 DIADE, 34394 Montpellier, France

12 e. Institut Universitaire de France, 75231 Paris cedex 05, France

13

14 Corresponding authors:

15 Moaine El Baidouri ([moaine.elbaidouri@univ-perp.fr](mailto:moaine.elbaidouri@univ-perp.fr))

16 Olivier Panaud ([panaud@univ-perp.fr](mailto:panaud@univ-perp.fr))

17 + : These authors contributed equally.

18

19 **Abstract**

20 **Background**

21 Horizontal transfer (HT) refers to the exchange of genetic material between divergent species  
22 by mechanisms other than reproduction. In recent years, several studies have demonstrated  
23 HTs in eukaryotes, particularly in the context of parasitic relationships and in model species.  
24 However, very little is known about HT in natural ecosystems, especially those involving  
25 non-parasitic wild species, and the nature of the ecological relationships that promote these  
26 HTs.

27 **Results**

28 In this work, we conducted a pilot study investigating HTs by sequencing the genomes of 17  
29 wild non-model species from a natural ecosystem, the Massane forest, located in southern  
30 France. To this end, we developed a new computational pipeline called INTERCHANGE that

1

2

1 is able to characterize HTs at the whole genome level without prior annotation and directly in  
2 the raw sequencing reads. Using this pipeline, we identified 12 HT events, half of which  
3 occurred between lianas and trees. We found that mainly low copy number LTRs  
4 retrotransposons from the Copia superfamily were transferred between these wild plant  
5 species, especially those of the Ivan and Ale lineages.

## 6 **Conclusion**

7 This study revealed a possible new route for HTs between non-parasitic plants and provides  
8 new insights into the genomic characteristics of horizontally transferred DNA in plant  
9 genomes.

## 10 **Keywords**

11 Horizontal Transfer, Natural Ecosystem, Climbing Plants, Trees, LTRs-retrotransposons,  
12 Genome Evolution, Genomics

## 13 **Background**

14 Horizontal transfer (HT) is a process by which genetic material is exchanged between two  
15 distinct species without reproduction. HTs are well documented in prokaryotes and  
16 considered to play a major role in the adaptation and colonization of new ecological niches  
17 [1]. The rapid spread of antibiotic resistance genes among bacteria is a good example of the  
18 adaptive role of HTs [2]. Although HTs are thought to be less common in eukaryotes,  
19 numerous examples of HTs between multicellular eukaryotes such as plants, animals and  
20 insects have been reported in recent years [3–8]. Indeed, over the past decades, the number of  
21 sequenced and assembled genomes has steadily increased, facilitating the discovery of several  
22 horizontally transferred genes and transposable elements (TEs) between eukaryotes [9–12].  
23 Some of these described HTs were adaptive [13–18]. For instance, in plants, there are several  
24 major cases of HTs leading to adaptive innovations such as the recent case of a detoxification  
25 gene transmitted horizontally from an endophytic fungus to a wild cereal (*Thinopyrum*)  
26 allowing the latter to become resistant to *Fusarium* [17]. This naturally transferred gene was  
27 further introduced by breeders into wheat through wide hybridization, resulting in broad  
28 resistance to ear blight and crown rot. Another recent example is the acquisition of a  
29 detoxification gene through HT in the whitefly, a plant feeding insect, which enables it to  
30 overcome host plant defences [18].

1 Host-parasite interactions has been shown to promote HTs in eukaryotes, such as in parasitic  
2 plants. This is particularly true for the *Orobanchaceae* [19], *Striga* [20], *Cuscuta* [21] and  
3 *Rafflesia* [22,23]. In animals, a bloodsucking insect has for instance transferred multiple  
4 transposon families between different mammalian species it parasitizes [24]. Natural grafting  
5 [25,26] could also facilitate the occurrence of HTs between plant species. There is also strong  
6 evidence that HTs occurs between species that do not share any host/parasite interaction [9–  
7 12,27].

8 The vast majority of previous studies on HTs have been conducted using genomic data from  
9 public databases of model species for which sympatric relationships and the nature of  
10 biological interactions are not always known. This represents a major hurdle in attempts to  
11 understand the mechanisms and nature of biotic relationships that can promote HTs in natural  
12 ecosystems. Furthermore, while previous reports have shown that both genes and TEs can be  
13 horizontally transferred between eukaryotes such as plants, it is not clear whether these two  
14 genomic components transfer at the same rate or whether certain types of genes or TEs are  
15 more frequently transferred than others. This is because these studies have focused on a group  
16 of specific genes or TEs, mainly because the methodologies used so far require prior  
17 annotation of the sequences of interest (genes or TEs) limiting any investigation of HTs at the  
18 whole genome level.

19 To address these questions, we conducted a pilot study aiming to investigate HTs in wild  
20 plant species from a natural ecosystem, the Massane beech forest located in southern France,  
21 considered as one of the last relict forests of the Quaternary Period in Europe [28]. We  
22 sampled 17 wild non-model species from this reservation, including trees, climbing plants,  
23 herbaceous species and fungi. Through de novo whole-genome sequencing of these species  
24 using *Illumina* and the development of a new computational pipeline named INTERCHANGE  
25 (for horIzoNtal TransfER CHAracterization in Non-assembled Genome) 12 HTs involving 8  
26 species have been identified. These HTs involve TEs, specifically low copy number LTR-  
27 retrotransposons from the *Copia* superfamily. Furthermore, we found that some climbing  
28 plants underwent multiple HT events with tree species which could constitute a new route of  
29 HT between non-parasitic plants.

## 30 **Results**

### 31 **INTERCHANGE a new strategy for horizontal transfer identification at the whole-** 32 **genome scale using short read sequencing data**

1

2

1 The inference of HTs is usually based on the use of three criteria [29,30]: i) high sequence  
2 similarity between evolutionary divergent species (HS); ii) phylogenetic incongruence  
3 between the evolutionary history of the species and that of the transferred sequence (PI); iii)  
4 patchy distribution of the transferred sequence in the phylogeny of the species (PD). In other  
5 words, no homologous sequence of the transferred DNA is found in the closest relative of the  
6 recipient species. Previous methods used for HT detection based on one or two of the above  
7 criteria require the prior genome assembly and annotation. This makes HT studies between  
8 wild non-model species for which there is no reference genome or annotation available very  
9 challenging. We have therefore developed a new pipeline to identify highly conserved regions  
10 that may arise from HT between two or several genomes of non-model species using raw  
11 short-read sequencing data. Briefly, this automatic pipeline that we called INTERCHANGE,  
12 (i) first identifies similar reads derived from conserved locus between the studied species  
13 using a K-mer approach (ii) assembles these reads into scaffolds (iii) annotate the scaffolds  
14 (iv) and test for high sequence similarity (HS) by comparing the sequence identity between  
15 conserved scaffolds with that of orthologous genes. Those HT candidates are then manually  
16 tested for the PI and PD criteria. The main steps of this pipeline are shown in Figure 1 and  
17 described in details in the method section.

### 18 **INTERCHANGE validation using simulated horizontal transfers**

19 To test the accuracy of INTERCHANGE, we simulated HT events involving both genes and  
20 transposable elements (TEs) of various classes and superfamilies between three plant models:  
21 *Arabidopsis thaliana*, *Oryza sativa* and *Brachypodium distachyon* (Figure 2, see method for  
22 details). These species were chosen because they have high-quality, well-annotated reference  
23 genomes and present a contrasting evolutionary divergence times. *A. thaliana* and *O. sativa*  
24 share a last common ancestor 160 million years ago, while the two Poaceae species, *O. sativa*  
25 and *B. distachyon*, diverged from each other less than 46 million years ago  
26 (<http://www.timetree.org/>). HTs were simulated between these species with contrasting  
27 divergence times in both directions, using each species as a donor and a recipient (Figure 2-a).  
28 Using the assembled reference genomes, we inserted 100 genes and 100 TEs from *A. thaliana*  
29 into the *O. sativa* reference genome, and 100 genes and 100 TEs from *O. sativa* into the *A.*  
30 *thaliana* reference genome, resulting in 400 simulated HT events between these two species  
31 (see methods section). Before inserting these sequences into the recipient genomes, random  
32 artificial mutations were introduced to simulate both ancient and recent HTs as described in

1 the method section. Next, *Illumina* short reads were simulated for each genome harboring  
2 these *in silico* HTs. The same HT simulation was carried out between *O. sativa* and *B.*  
3 *distachyon*.

4 The INTERCHANGE pipeline was applied to these species using simulated short read  
5 sequencing data from the artificially modified genomes that incorporated simulated HT  
6 events. INTERCHANGE was able to identify 90% (361 out of 400) of simulated HT events  
7 between *A. thaliana* and *O. sativa* (Figure 2-b) (HS = 80%). 10% of simulated HTs were false  
8 negative (39 out of 400) and only one single scaffold candidate was a false positive. Among  
9 the identified HTs, 52 % were genes and 48 % were TEs. For the pair *O. sativa* and *B.*  
10 *distachyon*, INTERCHANGE identified 73% (292/400) of simulated HTs (53% genes and  
11 47% TEs) with a false negative rate of 27% (109 out of 400) and 743 false positives. 85% of  
12 these false positives correspond to scaffolds smaller than 500 bp and correspond to highly  
13 conserved genes with a sequence similarity higher than the HS threshold (i.e HS = 87%).  
14 False negative correspond to simulated HTs with lower sequence similarity than the threshold.  
15 This increase in false negative rate and false positive rate compared to *A. thaliana* and *O.*  
16 *sativa* can be explained by the smaller evolutionary distance between the two Poaceae  
17 species. As shown in Figure 2-b, when only scaffolds with longer size are considered  
18 however, the number of false positives decreases significantly, with a smaller decrease in true  
19 positives and without affecting the relative proportion of detected genes and TEs. For  
20 instance, by limiting the candidates to those with a scaffold size longer than 1 kbp, the  
21 number of false positives decreased by 93% (from 743 to 52) while the number of true  
22 positives decreased by only 17% (from 292 to 241) (Figure 2-b). This simulation clearly  
23 demonstrate that INTERCHANGE is able to efficiently identify simulated HTs directly from  
24 the raw reads without any detection bias towards genes or TEs. Additionally, the sensitivity of  
25 INTERCHANGE increases as the evolutionary distance between the species involved in HTs  
26 increases.

## 27 **INTERCHANGE validation using real data allows detection of unknown horizontal** 28 **transfer events**

29 To further validate INTERCHANGE pipeline, we applied it to five distant plant genomes for  
30 which several HT have been previously reported [9]: grapevine (*Vitis vinifera*), peach (*Prunus*  
31 *persica*), poplar (*Populus trichocarpa*), date palm (*Phoenix dactylifera*) and clementine  
32 (*Citrus clementina*). These highly divergent species have experienced 6 HTs of LTR-

1 retrotransposons named BO1, BO2, BO3, BO4, BO7 and BC1 (BO : HT between plant  
2 orders; BC : HT between plant classes) [9]. In this previous study, the identification of these  
3 HTs was done through a comparative genomic analysis using assembled and previously  
4 annotated genomes. Here, we used the unassembled short reads of the same species  
5 (Supplemental Table 1) to test whether INTERCHANGE could detect the previously reported  
6 HTs using a minimum scaffold size filter of 1 kbp to reduce the number of false positives as  
7 suggested by our HT simulation.

8 A total of 10 whole genome comparisons were performed between the 5 species and 31 HTs  
9 candidates were identified using INTERCHANGE, of which 30 correspond to LTR  
10 retrotransposons (29 *Copia* and 1 *Gypsy*) and one single gene (*Elongation factor 1*)  
11 (Supplemental Table 2). In addition to the HS criteria used by INTERCHANGE, we tested for  
12 the PI and PD criteria (see Method). The PD criterion was only tested if the HS and PI criteria  
13 are satisfied. Nine HT candidates meet both the HS, PI and PD criteria, while for the other 22,  
14 only one criterion was met leading to their rejection for further analysis (Supplemental Table  
15 2). Four among the six known HTs (BO1, BO3, BO4 and BO6) were identified by our new  
16 strategy (see Figure 3). BO2 and BC1 were not detected by INTERCHANGE because they  
17 did not pass the 1kbp scaffold size filter (Supplemental Table 2). Remarkably,  
18 INTERCHANGE detect an additional five HTs that were not previously identified by El  
19 Baidouri et al. (2014). This include two HTs between grapevine and date palm (HT1, HT2),  
20 one HT between grapevine and poplar (HT3) and two HTs between poplar and prunus (HT4,  
21 HT5). Interestingly, as with the previously identified HTs, these new HTs correspond to  
22 LTRs-retrotransposons from the *Copia* superfamily. Strikingly, the LTR-retrotransposons  
23 identified by INTERCHANGE as having been transferred between grapevine and date palm  
24 (HT1 and HT2) have a high degree of sequence identity at 91% and 95.5%, respectively,  
25 suggesting a more recent transfer than the previously identified transfer (86% for BC1)  
26 (Supplemental Table 2). All newly identified HTs were also found in the reference genomes  
27 of species involved in HTs, providing further evidence of the reliability of the  
28 INTERCHANGE pipeline.

### 29 **Characterization of horizontal transfers between wild non-model species from a natural** 30 **ecosystem**

31 In order to better understand the nature of biotic interactions that can promote HTs in natural  
32 ecosystems and whether some particular genes or TEs are more prone to HT than others, we

1 chose the Massane forest, a protected reserve in southern France and a unique site in Europe  
2 designated as a UNESCO World Heritage Site in July 2021. It is mainly composed of beech  
3 trees (*Fagus sylvatica*) located between 600 and 1158 m of altitude and covering 336 hectares  
4 in total. We sampled 17 different species from this ecosystem including 14 plant species and 3  
5 fungi (see Table 1). The plant species selected include 6 tree species, 4 lianas/climbing plants,  
6 2 herbaceous, 1 bramble, and 1 shrub and are all non-parasitic species. The 3 fungi species  
7 were collected from tree trunks or dead wood and include 2 sporophytic and 1 parasitic  
8 species. The selection of these species was based on a combination of biological and technical  
9 criteria, including: (i) the nature of their biotic interactions, including those with close  
10 relationships such as parasitism or physical proximity, and those with no known close  
11 interactions; (ii) genome size, with the aim of obtaining sufficient sequencing coverage for the  
12 detection of HTs. The selected species have a genome size smaller than 3 Gbp; (iii)  
13 abundance in the Massane forest, to facilitate collection; and (iv) taxonomic diversity to  
14 optimize phylogenetic representation.

15 The genomes of the selected species were sequenced using *Illumina* short-reads technology  
16 with 20X coverage (see Method and Supplemental Table 3). Using INTERCHANGE, we  
17 performed 136 whole-genome pairwise comparisons to identify highly similar regions  
18 between these species that may have originated from HTs. INTERCHANGE detected 68 HT  
19 candidates comprising 46 TEs and 22 genes and involving 8 out of the 17 studied species (see  
20 Supplemental Table 4). In order to avoid redundancy of candidates due to the presence of  
21 multiple paralogs, clustering was performed using SiLiX [32], resulting in 48 HT clusters  
22 (see Supplemental Table 4). To test the PI criteria, HT candidates were aligned to 400 plant  
23 genomes using Blastn (See Supplemental Table 5). Phylogenetic trees of the transferred TEs  
24 were constructed and compared to the phylogenetic trees of species (see Method Step 9). In  
25 total, of the 48 HT candidates (22 genes and 25 TEs) that met the HS criteria only 12 TE  
26 candidates also met the PI criteria (Supplemental Figure 2 to 13). 11 of the 12 TE candidates  
27 belongs to the LTR Copia superfamily (named MaCo01 to MaCo12, for Massane Copia) and  
28 1 element belongs to the Gypsy superfamily (MaGy01, for Massane Gypsy). We further  
29 checked the presence/absence of these TEs in the genome 400 plant genomes to test for the  
30 PD criteria. This analysis clearly showed that these elements have a patchy distribution, thus  
31 confirming the occurrence of HT (see Supplemental Figure 14, to 24). Notably, both the  
32 phylogenetic trees and the patchy distribution of these transferred TEs in 400 plant species

1 point to other possible HT of the same elements between multiple plant species, suggesting  
2 that these elements may have undergone multiple HTs during their evolution.

### 3 **Wet-lab validation of the horizontally transferred LTR-retrotransposons**

4 To rule out potential contamination between the investigated species, despite all the  
5 precautions taken during sampling (see Methods), we performed PCR and sanger sequencing  
6 to check the presence of the identified HTs in the genome of the 8 species involved in HTs.  
7 To do this, we re-sampled two additional individuals from each of the 8 species and extracted  
8 their DNA. For each transferred LTRs, a set of two primer pairs was designed to amplify  
9 different regions of each element (Supplemental Table 6, Supplemental Figure 26 and  
10 Supplemental Figure 27). In the two individuals of the species involved in the HTs, the  
11 transferred LTRs were successfully amplified. For one candidate (MaCo11), only one of the  
12 two primer sets results in PCR amplicon (Supplemental Figure 26). One PCR amplicon from  
13 each transferred LTR was selected for sanger sequencing. Multiple sequence alignment of the  
14 PCR product sequences and the sequences of the elements detected using INTERCHANGE,  
15 as well as the construction of a phylogenetic tree, validate the occurrences of these HTs (see  
16 Data Availability). We also verified the presence of the transferred LTRs in the genomes of  
17 the donor/recipient species for which a reference genome is available. These are *A. glutinosa*,  
18 *F. sylvatica*, *F. excelsior* and *P. avium*. All the transferred LTRs implicating one of these  
19 species were identified in their respective reference genome. Additionally, we sampled and  
20 sequenced the genome of two *H. helix* individuals (Ivy A : ~4Gb ; N50=14.4 kbp and Ivy B :  
21 ~4Gb ; N50=14.6 kbp) and one *F. sylvatica* (7.4 Gb ; N50=20 kbp) using Nanopore  
22 sequencing (see Method section). We were also able to unambiguously identify the  
23 transferred LTRs involving these two species in different Nanopore reads corresponding to  
24 different paralogs (see Supplemental Figure 28 and 29). Taken together, these results clearly  
25 refute the possibility that the HTs identified in this study are the result of contamination.

### 26 **Species involved and age of horizontal transfers**

27 Among the 12 HTs that we identified, none involved a saprophytic or parasitic fungi. As  
28 shown in Figure 3, these HTs occurred between 8 out of the 17 studied species. The species  
29 involved in these transfers are essentially trees and climbing plants. Indeed, 5 of the 6  
30 analyzed tree species have experienced at least one HT event. These are, in decreasing order  
31 of HT frequency: *Fraxinus excelsior* (6 HTs), *Fagus sylvatica* (5 HTs), *Alnus glutinosa* (2  
32 HTs), *Acer monspessulanum* (2 HTs), *Prunus avium* (1 HT). For the climbers, two species

1

2



1 among the five analyzed have undergone HTs, namely *Dioscorea communis* (5 HTs) and  
2 *Hedera helix* (2 HTs). These HTs were identified between phylogenetically distant species  
3 that do not belong to the same plant class. In particular, the five HTs involving *D. communis*  
4 (Figure 4), which is a monocot species, occurred with eudicot species that diverged over 150  
5 million years ago. Interestingly, most HTs involving *D. communis* (4/5 HTs) and *H. helix* (2/2  
6 HTs) occurred with tree species which may suggest that the close physical relationship  
7 between lianas and trees may be a facilitator of HTs between those plants. Additionally, we  
8 found that some species pairs underwent multiple independent HTs of different LTR families  
9 such as the ones that occurred between *D. communis* and *F. excelsior* (2 HTs) and between *F.*  
10 *excelsior* and *F. sylvatica* (2 HTs). The direction of the HTs could not be determined,  
11 although the patchy distribution is clearly shown for all transferred LTRs (Supplemental  
12 Figures 14-25), as this will require further sampling and sequencing of additional plant  
13 genomes.

14 Sequence identity between the transferred LTRs varies from 89 to 97% (Supplemental Table  
15 4), corresponding to an age of transfer between 3.8 and 1.15 million years (Mya) (using the  
16 molecular clock rate of Ma and Bennetzen, 2004)[33]. This indicates that these HTs occurred  
17 millions years ago and are therefore ancient. This is also supported by the PCR analysis on  
18 different individuals that indicate that these HTs are likely to be fixed in populations of these  
19 species. Additionally as shown earlier, for the species for which the reference genome is  
20 available (*F. sylvatica*, *F. excelsior*, *P. avium* and *A. glutinosa*) the transferred elements were  
21 found in their respective genomes pointing to ancient HT events. From the available data, it  
22 cannot be determined where these HTs took place and whether they occurred in the Massane  
23 forest, despite its ancient origin. It is important to note however that all species involved in  
24 these HTs are native to European and Mediterranean regions and that their respective  
25 geographic distributions overlaps, indicating that they have been in contact for a long period  
26 of time, thus facilitating the occurrence of HTs.

### 27 **Copia LTRs-retrotransposons are the most frequently horizontally transferred elements** 28 **in the investigated plant species**

29 Despite the fact that our approach of HT identification does not focus on specific types of  
30 sequences such as TEs or genes, unlike all other approaches, the HTs identified in the  
31 Massane forest involve only LTRs-retrotransposons. Some might argue that INTERCHANGE  
32 has a bias toward LTR-retrotransposons transfer detection, but our simulations have shown

1 that this is not the case. Further characterization of the protein-coding genes of these  
2 transferred LTR-retrotransposons shows that 11 out of 12 belong to the *Copia* lineages (i.e.  
3 MaCo01 to MaCo11) and one belongs to the *Gypsy* lineage (MaGy01). This result is  
4 consistent with what we observed in our previous work, where *Copia* were more frequently  
5 transferred than *Gypsy* (28 *Copia* vs 7 *Gypsy*) [9]. However, in order to ascertain this, it is  
6 essential to check whether this is not due to an overrepresentation of the *Copia* superfamily  
7 among other LTRs in the surveyed genomes. For this purpose, we estimated the relative  
8 frequencies of *Copia* and *Gypsy* in the 8 species involved in HTs by aligning their raw  
9 genomic reads to a collection of reference protein sequences [34] using Diamond Blastx [35]  
10 (See Method). As shown in Figure 5-a, *Copia* elements were more prevalent than *Gypsy*  
11 elements in 6 out of the 8 species, equally abundant in *D. communis* and less prevalent in *H.*  
12 *helix*. On average, *Copia* were 1.4 times more prevalent than *Gypsy*. However this can not  
13 explain that 11 out of the 12 identified HTs belong to the *Copia* clade.

#### 14 **The transferred *Copia* LTR-retrotransposons belongs to Ale and Ivana lineage**

15 We then investigated whether some *Copia* lineages have a greater propensity to transfer than  
16 others. To this end, we extracted from the Rexdb database the reverse transcriptase (RT)  
17 protein sequences of 17 *Copia* reference clades described in the literature [34] as well as those  
18 of the 11 transferred *Copia* (MaCo01 to MaCo11) identified in this study (21/22 paralogs)  
19 (see Method). Furthermore, we also extracted the RT domain of the 28 *Copia* previously  
20 identified as horizontally transferred between several plant species [9]. The constructed  
21 phylogenetic tree shows that for the previously described HTs, 21 *Copia* (75%) belong to only  
22 two lineages Ale (13) and Ivana (8) where the 7 remaining HTs belong to different lineages  
23 such as Tork, TAR or Bianca (Figure 5-b). This trend was even more pronounced for the  
24 *Copia* elements identified in the Massane forest. In fact, all transferred elements belong only  
25 to these two lineages: Ivana (6 /11) and Ale (5/11) (Figure 5-b).

26 These results suggest that these two lineages are more prone to HTs compared to other *Copia*  
27 lineages in the studied species. In order to check whether this observation could be due to an  
28 overrepresentation of these two *Copia* lineages in the analyzed plant genomes, we estimated  
29 the frequency of all known *Copia* clades in the 8 plant species involved in the identified HTs  
30 (see Method). This analysis shows big disparities in *Copia* lineages frequencies in those  
31 species with no particular conserved trend. In five of the eight species involved in HTs (*A.*  
32 *glutinosa*, *D. communis*, *F. sylvatica*, *P. avium*, *R. ulmifolius*) the Ale lineage was the

1 predominant *Copia* lineage ranging from 8.6% in *A. monspessulanum* to 37.8% in *P. avium*  
2 (Figure 4-b). On average Ale accounted for 24% of the *Copia* elements in these genomes,  
3 followed by SIRE lineage (16.6%). Meanwhile, the percentage of the Ivana lineage varies  
4 from 3.3% in *A. monspessulanum* to 17% in *D. communis* with an average of around 6.5%.  
5 These results show that the strong bias observed in transferred elements belonging to Ale and  
6 Ivana lineages cannot be explained by the relative abundance of these lineages in the genomes  
7 of the species involved in the HTs.

### 8 **The horizontally transferred *Copia* are active after their transfer but show low** 9 **transpositional activity in both donor and receiver species**

10 To better understand the dynamics of the transferred elements, we estimated their copy  
11 number in both donor and receiver species using unassembled raw genome sequencing reads.  
12 To this end, we used the coverage of single-copy BUSCO genes as a standard to normalize  
13 the observed coverage of each transferred element (see Methods). This analysis show that  
14 copy number of the transferred elements varies from single copy to 28 copies for the Gypsy  
15 MaGy01 with an average of 4.3 copy per species (see Supplemental Table 7). For the HTs  
16 where we could identify the direction of HT, we can notice that some *Copia* did not transpose  
17 after their transfer (3/8) since they are single copies in the recipient species. The remaining  
18 elements show, on the contrary, a transpositional activity in the host recipient genomes that  
19 results in several copies. However, this post-transfer transpositional activity appears to be  
20 low, with only 2 to 5 copies observed for each transferred LTRs. It is interesting to note that  
21 this low transpositional activity is also observed in the donor species, suggesting that it is an  
22 inherent feature of the transferred *Copia element*.

## 23 **Discussion**

### 24 **INTERCHANGE a new pipeline for HT characterization at the whole-genome scale** 25 **using raw sequencing reads**

26 In this study we investigated for the first time HTs between wild non-model species within a  
27 natural ecosystem. We sequenced the whole genome of 17 species including trees, climbing  
28 plants and fungi and characterized HTs directly from raw sequencing reads thanks to  
29 INTERCHANGE pipeline. Using this tool, we were able to report new HT events in  
30 previously studied species that had not been identified using previous methods [9]. In this  
31 study, we demonstrated the utility of INTERCHANGE for genome-wide screening of HT

1 events between non-model species, using both simulated and real datasets. Importantly, our  
2 approach obviates the need for costly and time-consuming genome assembly and annotation,  
3 which are often major bottlenecks for conducting such studies.

4 As indicated by our evaluation of INTERCHANGE some of the known or simulated HT even  
5 did not pass the 1 kbp scaffold size filter. A decrease in scaffold size may allow  
6 characterization of these events, but this will be at the expense of specificity. Other  
7 parameters may also impact the specificity or sensitivity of INTERCHANGE. For example,  
8 the smaller the k-mer size, the greater the sensitivity and vice versa, but this will lead to an  
9 increase in the computational time needed to perform all the possible pairwise comparisons.  
10 The different parameters of INTERCHANGE can be modified by the user which allows great  
11 flexibility. However, we shall point out that INTERCHANGE can only detect relatively  
12 recent HTs because high sequence divergence between older transferred sequences will not  
13 satisfy the HS criteria. Despite these limitations, our results show that this pipeline is very  
14 efficient at detecting gene and TEs HT events at the whole-genome scale using unassembled  
15 sequencing reads and is therefore a tool of choice for future studies of HT in natural  
16 ecosystems. INTERCHANGE could also be used to identify conserved sequences such as  
17 homologous genes, TEs or other types of sequences from unassembled genomes, which could  
18 be very useful for comparative genomics studies.

### 19 **No plant-fungus horizontal transfer was identified at the Massane forest**

20 Using the INTERCHANGE pipeline, we were able to identify 12 HTs implicating 8 plant  
21 species. We did not identify any transfer involving fungi even though the three studied species  
22 are saprophytic or parasitic and known to proliferate on tree trunks or dead wood. It is broadly  
23 accepted that close relationships such as endosymbiosis or parasitism are favorable for HTs in  
24 eukaryotes [19,21,24,36–38]. The absence of plant-fungus HT in this study may suggest that  
25 such events are rare or too old to be detected [39].

### 26 **Liana-tree interactions: a possible new route of horizontal transfer between non-** 27 **parasitic plants?**

28 Our results also show that the two climbing plants, the common ivy (*H. helix*) and black  
29 bryony (*D. communis*) have experienced several HTs events predominantly with trees. These  
30 findings are in agreement with our previous study that showed a higher frequency of HTs  
31 between grapevines and several tree species [9]. To date, no hypothesis has been put forward

1 to explain this higher frequency of HT in grapevines and whether it is due to an inherent  
2 genetic trait or to its particular ecological lifestyle. In fact, similarly to common ivy and black  
3 bryony, wild grapevine use trees as support for growth which could explain the high HT  
4 frequency observed in this species. A recent study on four different and closely related *Vitis*  
5 species seems to confirm this trend [40]. Using comparative genomics, the authors identified  
6 dozens of HTs between these four closely related vine species and mainly trees belonging to  
7 highly divergent taxa, although they did not highlight the greater frequency of HTs between  
8 grapevine and trees. In light of our findings, we hypothesize that liana-tree interactions may  
9 favor HTs between non-parasitic plants and could be considered as route by which HTs occur  
10 frequently in nature. For the three other climbing plant genomes analyzed in this study, we did  
11 not find any HT. Therefore, the question of whether some climbing plants are more prone to  
12 HTs than others remains unanswered at this point. This needs to be tested on a larger  
13 sampling of liana species. It is also possible that the tree-to-tree HTs that we identified  
14 between beech (*F. sylvatica*), ash (*F. excelsior*) or alder (*A. glutinosa*) could be mediated by  
15 other, yet not sequenced, climbing plant species.

#### 16 **Horizontal transfers in plants mainly involve low copy number LTR-retrotransposons** 17 **belonging to the Ivana and Ale lineages of the *Copia* superfamily**

18 Our study reveals that LTR-retrotransposons are the only genetic elements that experienced  
19 HTs in the studied plant species, which confirms earlier reports, but remains without  
20 mechanistic explanation. In fact, successful HT requires three key steps, namely the  
21 "excision" of genetic material in the form of DNA or RNA molecules from the donor genome,  
22 its transport to the recipient species and finally its integration into the target genome. Due to  
23 their transposition life style, LTR-retrotransposons are able to generate extrachromosomal  
24 double stranded DNA encapsidated in the VLP (Virus Like Particule) and accumulating in the  
25 cytoplasm of the cells [41,42]. They also have the ability to integrate into the host genome  
26 using the integrase (IN) [43,44]. LTR-retrotransposons may therefore be more likely to  
27 achieve successful HT, given their ability to generate double stranded DNA encapsidated in  
28 the VLP and because of their ability to integrate the host genome. Although both *Copia* and  
29 *Gypsy* elements can produce VLPs, *Copia* appears to be more prone to horizontal transfer  
30 than *Gypsy* elements. If *Copia* and *Gypsy* superfamilies differ mainly in the order of the IN  
31 and RT domains, there are some genomic and transpositional features specific to each of these  
32 superfamilies. For instance, *Copia* elements are abundant in gene-rich euchromatic regions

1 while Gypsy elements are mainly located in Heterochromatic and pericentromeric regions  
2 [45]. *Copia* are also generally activated in response to environmental stress as it has been  
3 shown for many plant species [46]. It is therefore possible that *Copia* elements, because of  
4 their presence in transcriptionally active regions of the genome and because of their  
5 responsiveness to environmental stresses could facilitate their HT.

6 Intriguingly, *Copia* elements that have been horizontally transferred between plant genomes  
7 belong mainly to the Ivana and Ale lineage and are low copy numbers. The reasons why Ale  
8 and Ivana clade appear to be more prone to HT compared to the other *Copia* lineages remain  
9 unknown, as there are no well-known common specific features of these two clades that  
10 clearly differentiate them from others [47]. A recent population genomics study in  
11 *Arabidopsis arenosa* showed that *Copia* elements, particularly Ale and Ivana respond to  
12 temperature and irradiance [48]. It is also interesting to note that the TEs shown to be  
13 currently active in *A. thaliana* namely *EVADE* [49] and *ONSEN* [50], also belong to the Ale  
14 and Ivana clade, respectively, and the latter is active in response to heat stress [50]. As for the  
15 transferred *Copia*, these two families also have a low copy number: two copies for *EVADE*  
16 and eight copies for *ONSEN*. When a TE family reaches high copy numbers, it tends to be  
17 silenced by the production of small interfering RNAs and the epigenetic machinery depositing  
18 DNA methylation [51]. The silenced TEs would not be candidate for HT. If this holds true,  
19 the question of the presence and survival of Gypsy families in eukaryotic genomes remains to  
20 be explained by other mechanisms. Considering our study and previous ones on HT in plants,  
21 the propensity of *Copia* elements and in particular Ale and Ivana lineages to transfer  
22 horizontally can not be explained. Further studies are needed to elucidate the reasons for the  
23 remarkable ability of low copy number *Copia* to transfer horizontally in plants.

## 24 **Conclusions**

25 In this work, we conducted a pilot study on HTs *in natura* in a forest ecosystem. For this  
26 purpose, we implemented a new comparative genomics pipeline able to identify HTs at the  
27 whole genome level directly from raw sequencing reads. We characterized 12 HTs that all  
28 correspond to *Copia* LTRs retrotransposons and particularly those belonging to the Ale and  
29 Ivana lineages. Our study also shows that some lianas species have experienced recurrent  
30 horizontal transfers with trees that constitute their growth support in nature. This work sheds  
31 light on a new route of HTs between non-parasitic plant species and the type of genetic  
32 elements most likely to be horizontally transferred in plants.

1

## 2 **Material and methods**

### 3 **Sampling**

4 The 17 species analyzed were sampled in the Massane Forest National Nature Reserve. After  
5 sampling the target tissues (leaf or sporophore), the samples were first washed with a  
6 detergent solution (Tween 80 at 0.1%) and then rinsed twice successively in a miliQ water  
7 solution. The samples were then dried with absorbent paper and stored in liquid nitrogen and  
8 then at -80°C once in the laboratory before DNA extraction.

### 9 ***Illumina* genome sequencing**

10 DNA from each sample was extracted using the CTAB2X [52] and the quality of the DNA  
11 was estimated by Nanodrop (Thermo Scientific) and Qubit (Invitrogen) quantification. DNA  
12 libraries and sequencing was outsourced to Novogene company using the a Hiseq 2000 and  
13 Novaseq 6000 platforms. Briefly, a total amount of 1µg DNA per sample was used as input  
14 material for the DNA libraries. Sequencing libraries were generated using NEBNext® DNA  
15 Library Prep Kit following manufacturer's recommendations and indices were added to each  
16 sample. The genomic DNA was randomly fragmented to a size of 350bp by shearing, then  
17 DNA fragments were end polished, A-tailed, and ligated with the NEBNext adapter for  
18 *Illumina* sequencing, and further PCR enriched by P5 and indexed P7 oligos. The PCR  
19 products were purified (AMPure XP system) and resulted libraries were analyzed for size  
20 distribution by Agilent 2100 Bioanalyzer and quantified using real-time PCR. Paired-end  
21 sequencing was performed using a coverage of 20X and a read length of 150bp for each  
22 sample.

### 23 ***Nanopore* genome sequencing**

24 High-molecular-weight genomic DNA was extracted from 0.41 g to 0.5 g of frozen leaf tissue  
25 according to [53] and the Oxford Nanopore Technologies protocol (February 2019). Briefly,  
26 after lysis of cell membranes with Carlson buffer, proteins were removed with chloroform.  
27 DNA was purified using Qiagen Genomic-tip 100 columns following the manufacturer's  
28 instructions. A selection of fragments > 10 Kb was performed using AMPure XP beads. DNA  
29 quantification was performed by Nanodrop (Thermo Scientific) and Qubit assays (Invitrogen)  
30 and the quality was assessed on a 0.8% agarose gel. We then followed the 1D genomic DNA  
31 protocol by ligation with the SQK-LSK109 kit to prepare the 3 libraries using 3 µg, 3.9 µg,

1

2

1 and 4.1 µg of DNA (beech, ivy A, and ivy B), respectively. We successively loaded 1.7 µg of  
2 library onto a Flowcell R9, 2.6 µg and 2.7 µg of libraries onto two Flowcell R10. We  
3 produced 7.4 Gb, and 2 times 4 Gb of fastq pass reads with N50s of 20 kb, 14.4 kb and 14.6  
4 kb, respectively. Bascalling was performed using guppy in the high accuracy (hac) mode  
5 (<https://nanoporetech.com/nanopore-sequencing-data-analysis>).

## 6 **PCR and Sanger sequencing**

7 We utilized the Taq DNA Polymerase 2x Master Mix RED to carry out our PCR  
8 amplification. The mix was prepared for each sample by adding 7.5 µl of Taq 2x Master Mix,  
9 6.4 µl of H<sub>2</sub>O, 0.6 µl of the oligo F and R mix (10µM each), and 0.5 µl of DNA at 10ng/µl.  
10 The PCR program we employed consisted of a lid temperature of 98°C, followed by 34 cycles  
11 of denaturation at 95°C for 30 seconds, annealing at 60°C for 30 seconds, and extension at  
12 72°C for 2 minutes. This was followed by a final extension at 72°C for 5 minutes and a  
13 cooling step at 4°C for 10 minutes. Finally, the samples were electrophoresed on a 1%  
14 agarose gel containing TAE 0.5X for 25 minutes at 135 volts, along with a 1kb+ size marker,  
15 to visualize the PCR products. PCR products have been purified and sent to Eurofinsgenomics  
16 for sequencing using the LightRun Tube platform.

## 17 **Detection of Horizontal transfer using INTERCHANGE pipeline**

18 High similarity criteria (Step1 to 8 using INTERCHANGE automatic pipeline)

19 Step 1 - Identification of homologous reads derived from conserved regions using a k-mers  
20 approach: *k*-mers indexes (*k* = 30) were generated using Tallymer mkindex option [54]. with  
21 default parameters except for: -mersize 30; minocc 1. The search for identical *k*-mers between  
22 each species pair was performed using Tallymer search option with the following parameters:  
23 -output qseqnum qpos counts sequence.

24 Step 2 - Once identical *k*-mer have been identified between reads of two species, the  
25 overlapping *k*-mer are merged and the total similarity score is calculated for each pair of reads  
26 using the following formula: Read similarity = total length of identical non-overlapping *k*-mer  
27 / reads length. Reads with a similarity score greater than 50% are considered to originate from  
28 conserved homologous regions and are therefore kept for further analysis.

29 Step 3 - There are a significant number of identical *k*-mers that correspond to regions of  
30 simple repeats such as tandem repeats. Reads containing such repeats are removed using



1 Prinseq-lite tool [55] with the following parameters: out\_format 1; -lc-method dust; -lc-  
2 thresholds 10.

3 Step 4 - The homologous reads that pass the similarity filter are then extracted and assembled  
4 separately for each species using SPAdes [56] with the paired-end and only\_assemble options.  
5 This step will result in the assembly in each species of scaffolds corresponding to highly  
6 conserved regions potentially derived from HTs.

7 Step 5 - The assembled scaffolds are then aligned using both Diamond blastp [35] and  
8 BLASTn against several databases with a minimum e-value de 1e-5 et 1e-20 respectively:  
9 CDDdelta, Repbase, mitochondrial, chloroplast, and ribosomal (TIGR) gene database  
10 [57].First, sequences that align to mitochondrial, chloroplastic and ribosomal genes are  
11 excluded. Indeed, these genes are generally highly conserved between distant species and  
12 therefore often meet the criterion of high similarity. When a scaffold aligns to several target  
13 sequences from multiple databases, only target sequences with the highest alignment score are  
14 considered as being homologous. At the end of this step, each scaffold will be classified into  
15 one of these categories: genes, TEs, MCRs (mitochondrial, chloroplast or ribosomal genes)

16 Step 6 - Identification of homologous scaffolds: the objective of this step is to identify  
17 homologous scaffolds between each pair of compared species. For this purpose, a reciprocal  
18 Blastn is performed and homologous scaffolds are identified using the reciprocal best hit  
19 method (RBH).

20 Step 7 - In order to distinguish, among the set of conserved scaffolds identified by  
21 INTERCHANGE, those that could originate from HT, it is necessary to first test the criterion  
22 of high similarity (HS). This means that the similarity of the transferred sequences between  
23 the donor and recipient species must be significantly higher than that of orthologous genes.  
24 Before assessing this criterion, it is therefore important to identify and assemble the conserved  
25 orthologous genes in the investigated species from unassembled short reads.

26 Characterization of orthologous BUSCO genes from unassembled reads: (i) Since the studied  
27 species from the Massane forest did not have any available gene annotation, we have  
28 assembled and annotated their BUSCO genes. These genes were used to test the HS criteria  
29 and to build the species phylogenetic tree. As a first step, the BUSCO genes of 400 publicly  
30 available assembled plant genomes (Supplemental Table 5) were identified, resulting in a  
31 genomic database of ~169,000 BUSCO genes covering angiosperms, gymnosperms and basal

1 plant species (this database has been deposited on the following link <http://gamay.univ-perp.fr/~moaine/Database/>). The genomic reads of each sequenced species from the Massane forest were mapped against this BUSCO database by minimap2 [58]. using default parameters. The mapped reads were extracted, merged and assembled by SPAdes [56] using paired-end and -only\_assembler options. The resulting scaffolds were then realigned by Blastn against the nucleic BUSCO database and assigned to their corresponding BUSCO genes.

8 Step 8 - Identification of high sequence similarity threshold based on the distribution of orthologous gene identities: In order to identify whether conserved scaffolds have higher sequence similarity compared to orthologous BUSCO genes, a high similarity threshold (HS) is determined based on the distribution of orthologous gene sequence identities according to the following formula:  $HS = Q3 + (IQR/2)$ ; where Q3 is the third quartile, IQR is the interquartile range (Q3-Q1).

14 Step 9 - Phylogenetic incongruence criteria (PI)

15 Building the phylogenetic tree of the studied species: the phylogenetic tree of the studied species is built based on BUSCO genes previously identified in step 7. Multiple alignment of orthologous BUSCO genes of the studied species and the 400 plant genomes is performed using Mafft program [59]. The alignments are then cleaned with TrimAl [60] and the trees constructed with FastTree [61]. A consensus tree is then obtained using Astral [62] from the previously constructed trees.

21 Building the phylogenetic tree of the transferred sequence: To construct the phylogenetic tree of the transferred elements, we aligned each of these elements to the assembled genomes of 400 plant species using Blastn. Sequences with sequence identity greater than 80% and covering at least 60% of the element were considered homologous. We performed multiple alignments for each element and all its homologs using the Mafft program [59]. These alignments were then cleaned using trimAL [60] with the following parameters: -cons 30; -gt 0.5. Finally, phylogenetic trees for each transferred element were inferred with FastTree [61]. The resulting trees were then manually compared to the species trees to check for the presence or absence of phylogenetic incongruencies. The trees were visualized using the Iroki Phylogenetic Tree Viewer [63]. The PI criterion is met when the phylogenetic tree of the HT candidate shows that the donor and recipient species are sister clades, unlike the species tree.

1 Step 10- Testing the Patchy distribution (PD): Finally, to consider that there is an unequal  
2 distribution of this sequence in the tree of species, the candidate sequence must be found in  
3 species close to donor/recipient but missing in species closely related to partner implicated in  
4 the HT. Alternatively, the transferred sequence could also be found only in the two species  
5 involved in the transfer (Supplemental Figure 14 to 25).

6 Candidates meeting the HS, the PI and the PD criteria are therefore considered as resulting  
7 from HTs.

## 8 ***In silico* simulation of horizontal transfer events**

9 In this simulation, we randomly selected 100 genes and 100 Tes from each species and  
10 randomly introduced them into the reference genomes of the other species. For TEs, we  
11 selected different copies belonging to the major classes (Class I and Class II) and to various  
12 TEs superfamilies (LTRs, LINEs, MuDR, hAT, Mutator, Helitrons...etc) with an equivalent  
13 proportion when possible. Before inserting these genes and TEs into the recipient genome, we  
14 artificially introduced mutations to create sequence divergence, simulating both recent and  
15 ancient HTs. The mutated sequences had a sequence divergence ranging from 80% to 100%  
16 identity compared to the original copies in the donor species. Wgsim tool  
17 (<https://github.com/lh3/wgsim>) was used to simulate 150 bp length paired-end reads with 20X  
18 coverage from the donor and recipient genomes carrying the *in silico* HTs using default  
19 parameters.

## 20 **Estimation of copy LTRs number in unassembled genomes**

21 To estimate the copy number of each retrotransposon in the species involved in the transfer,  
22 we calculated the number of mapped reads on each transferred retrotransposon compared to  
23 the numbers of mapped reads on single-copy genes. Total reads for each species were mapped  
24 onto the transferred LTRs-retrotransposons. For each LTR-retrotransposon, we calculated the  
25 coverage at each nucleotide of the element. The median coverage was taken as a proxy for the  
26 coverage of the element in the genome. The same strategy was adopted to estimate the  
27 coverage of the BUSCO genes of the studied species. We then used the following formula to  
28 estimate the total copy number of each transferred LTRs using *Illumina* reads: Copy number  
29 = (MCT / MCB), where MCT is the median coverage of LTRs and MCB: median coverage of  
30 BUSCO genes. To test whether this approach is an appropriate method to estimate copy  
31 number using genomic raw reads, we compared the copy number estimated from unassembled

1 genomes with that obtained from assembled reference genomes in species for which the latter  
2 is available (Supplemental Table 5). Copy numbers estimated from unassembled genomes and  
3 those obtained by Blastn against reference genomes are highly correlated, validating our  
4 approach (Pearson correlation;  $R = 0.982$ ,  $p\text{-value} = 4.699\text{E-}10$ ).

### 5 **Phylogenetic tree of copia lineages**

6 We extract the RT (reverse transcriptase) domain of the transferred *Copia* elements in both  
7 donor and receiver species (22 paralogs corresponding to the 11 *Copia* families). For 60% of  
8 the paralogs (13/22), the RT domain was assembled using our automatic INTERCHANGE  
9 pipeline. For the others, the RT domain was lacking. We then manually reassemble the  
10 lacking RT domains using raw *Illumina* reads of the corresponding species. For species for  
11 which the reference genome is available (*F. sylvatica*, *F. exclesior*, *P. avium* and *A.*  
12 *glutinosa*), we realigned the raw reads to the reference genomes and used the reference  
13 elements as a guide for manual assembly. Alternatively, we used homologs from other closely  
14 related plant species to guide manual assembly. Using this strategy, we obtained for most  
15 *Copia* paralogs involved in HTs nearly the complete elements with the corresponding RT  
16 domain (21/22).

17

### 18 **Frequency estimates of the different *Copia* and *Gypsy* lineages**

19 To estimate the relative frequency of *Copia* and *Gypsy* in the sequenced genomes, we aligned  
20 the raw genome reads of each species to a collection of protein sequences corresponding to  
21 the different known *Copia* and *Gypsy* lineages from the RexDB [34] database by Diamond  
22 Blastx (evaluate  $1\text{e-}5$ ) [35]. The number of aligned reads on each superfamily and on each  
23 lineage was reported to the total number of aligned reads to estimate their relative frequency.

24

### 25 **Data Availability**

26 The data have been deposited in NCBI under BioProject accession number PRJNA788424 in  
27 the NCBI BioProject database (<https://www.ncbi.nlm.nih.gov/bioproject/PRJNA788424>).  
28 INTERCHANGE is open source and available at  
29 <https://github.com/emaubin/INTERCHANGE>. Multifasta sequences of 12 transferred LTRS  
30 (MaCo1 to MaCo12 and MaGy01) are available on this link  
31 (<http://gamay.univ-perp.fr/~moaine/MaCo-MaGy/>). PCR product sequences and multiple  
32 alignment of each of the 12 HTs are available on the following link (<http://gamay.univ-perp.fr/~moaine/PCR/>).

1

2

1

## 2 **Funding**

3 M.E is supported by a grant from the Agence Nationale de la Recherche (ANR-21-CE02-  
4 0031-01) and by the CNRS “diversity of biological mechanisms” call. O.P is supported by a  
5 BQR grant of the University of Perpignan, the Institut Universitaire de France and Occitanie  
6 region (Biodivoc). E.A is supported by a PhD grant from Occitanie region. M.M is supported  
7 by a grant from the Agence Nationale de la Recherche (ANR-21-PRCI-CE02). This study is  
8 set within the framework of the “Laboratoire d’Excellence (LABEX)” TULIP (ANR-10-  
9 LABX-41) and of the “Ecole Universitaire de Recherche (EUR)” TULIP-GS (ANR-18-  
10 EURE-0019).

11

## 12 **Conflict of interest**

13 The authors declare no conflict of interest.

## 14 **Author contributions**

15 M.E and O.P conceived and designed the study. J.G, E.A, M.E and O.P collected the samples.  
16 E.A and M.E performed the analysis. E.A and C.L extracted DNA for *Illumina* sequencing.  
17 C.L and M.M performed Nanopore sequencing. M.E wrote the manuscript with input from  
18 E.A. All authors provided critical feedback on the manuscript.

19

## 20 **Plant sampling statement**

21 The authors declare that the samples taken in the framework of this study comply with local  
22 and national legislation and that an authorization has been granted.

23

## 24 **Acknowledgements**

25 We are grateful to Marie-Christine Carpentier, Joris Bertrand for their help for plant sampling  
26 at the Massane forest.

## 27 **Figure legend and table**

| Common Name | Species                   | Type | Estimaed Genome size | Available reference genome |
|-------------|---------------------------|------|----------------------|----------------------------|
| Beech       | <i>Fagus sylvatica</i>    | Tree | 540 Mbp              | yes                        |
| Ash         | <i>Fraxinus excelsior</i> | Tree | 840 Mbp              | yes                        |

1

2

|                              |                              |            |          |     |
|------------------------------|------------------------------|------------|----------|-----|
| <b>Montpellier maple</b>     | <i>Acer monspessulanum</i>   | Tree       | 730 Mbp  | no  |
| <b>Wild cherry</b>           | <i>Prunus avium</i>          | Tree       | 430 Mbp  | yes |
| <b>Alder</b>                 | <i>Alnus glutinosa</i>       | Tree       | 500 Mbp  | yes |
| <b>Whitebeam</b>             | <i>Sorbus aria</i>           | Tree       | 1.03 Gbp | no  |
| <b>Hairy Greenweed</b>       | <i>Genista pilosa</i>        | Shrub      | 1.04 Gbp | no  |
| <b>Honeysuckle</b>           | <i>Lonicera periclymenum</i> | Liana      | 2.81 Gbp | no  |
| <b>Ivy</b>                   | <i>Hedera helix</i>          | Liana      | 1.5 Gbp  | no  |
| <b>Black bryony</b>          | <i>Dioscorea communis</i>    | Liana      | 830 Mbp  | no  |
| <b>Giant blackberry</b>      | <i>Rubus ulmifolius</i>      | Bramble    | 450 Mbp  | no  |
| <b>White Bryony</b>          | <i>Bryonia dioica</i>        | Liana      | 1.6 Gbp  | no  |
| <b>Sage</b>                  | <i>Salvia sp</i>             | Herbaceous | 760 Mbp  | -   |
| <b>Tinder Bracket</b>        | <i>Fomes fomentarius</i>     | Fungi      | 50 Mbp   | yes |
| <b>Coral Tooth</b>           | <i>Hericium clathroides</i>  | Fungi      | 40 Mbp   | no  |
| <b>Oyster mushroom</b>       | <i>Pleurotus ostreatus</i>   | Fungi      | 20/50Mbp | yes |
| <b>Narrow-leaved Ragwort</b> | <i>Senecio inaequidens</i>   | Herbaceous | 580 Mbp  | no  |

1  
2 **Table 1:** Species sampled in the Massane forest and whose genome has been sequenced by  
3 *Illumina* short read sequencing.

4 **Figure 1:** The different steps of the INTERCHANGE pipeline of horizontal transfer  
5 identification from unassembled and unannotated genomes. Steps 1 to 8 are completely  
6 automatic steps 9 and 10 are semi-automatic. Step1: Identification of identical k-mers using  
7 Tallymer [54]. Steps 2 & 3 Identification of reads derived from conserved regions & Removal  
8 of Tandem repeats using PRINSEQ lite [55]. Reads sharing at least 50% of identical k-mers  
9 are considered as homologous reads. Step 4: homologous reads are extracted and assembled  
10 for each pair of species using SPAdes [56]. Step 5: Scaffolds annotation using multiple  
11 protein and TEs database: CDDdelta, Repbase, mitochondrial, chloroplast, and ribosomal  
12 (TIGR) gene database. Step 6: Identification of homologous scaffolds using reciprocal best hit  
13 (RBH). Step 7: Identification of high sequence similarity threshold based on the distribution  
14 of orthologous BUSCO gene identities according to the following formula: high similarity  
15 threshold (HS) =  $Q3 + (IQR/2)$ ; where Q3 is the third quartile, IQR is the interquartile range

1 (Q3-Q1). Step 8: Testing for HS criteria. Step 9: Phylogenetic incongruence criteria. Step 10:  
2 testing the Patchy distribution (PD) of transferred sequence. For details see Method section.

3 **Figure 2:** Simulation of horizontal transfer (HT) between *A. thaliana* and *O. sativa* and  
4 between *O. sativa* and *B. distachyon*. a. 200 HT events were simulated in each direction  
5 (green arrows), comprising genes and TEs with equal proportion. b. INTERCHANGE results  
6 using short reads of genomes harboring simulated HTs. Y-axis indicate to the total number of  
7 HTs (scaffolds) identified by INTERCHANGE and X-axis represent filters based on scaffold  
8 size. The color codes are provided in the figure legend.

9 **Figure 3:** HTs identified by INTERCHANGE using real data. Lines represent the HT events  
10 identified from genome short read sequencing data. In green, HTs that were identified in a  
11 previous study [9] using reference genome and detected by INTERCHANGE from short  
12 reads. In gray, HTs missed by INTERCHANGE. In red, new HTs only identified by  
13 INTERCHANGE.

14 **Figure 4:** The phylogenetic tree of the 17 analyzed Massane species. The curves represent the  
15 identified HTs and link the involved species. Blue and red curves represent *Gypsy* and *Copia*  
16 HTs, respectively. The asterisks indicate multiple HTs. The horizontal scale represents the  
17 divergence time in million years (source: timetree.org). Correspondence of species names:  
18 Ace: *Acer monspessulanum*, Aln: *Alnus glutinosa*, Bry: *Bryonia dioica*, Dio: *Dioscorea*  
19 *communis*, Fag: *Fagus sylvatica*, Fra: *Fraxinus excelsior*, Fom: *Fomes fomentarius*, Gen:  
20 *Genista pilosa*, Hed: *Hedera helix*, Her: *Hericium clathroides*, Lon: *Lonicera periclymenum*,  
21 Ple: *Pleurotus ostreatus*, Pru: *Prunus avium*, Rub: *Rubus ulmifolius*, Sal: *Salvia sp*, Sen:  
22 *Senecio inaequendis*, Sor: *Sorbus aria*.

23 **Figure 5:** The relative abundance of LTRs-retrotransposon superfamilies in species that have  
24 experienced HTs. a) Relative frequency of *Copia* and *Gypsy* in the studied species involved in  
25 HTs. In blue: *Copia* frequency, in yellow: *Gypsy* frequency b) Phylogenetic tree of transferred  
26 *Copia* detected in this study using the RT domain. In bold, the consensus sequence of the  
27 reference *Copia* lineages. Maco1 to 11 correspond to horizontally transferred elements  
28 identified between the plant species from the Massane. BO1 to BO8, BG1 to BG and BC1  
29 correspond to *Copia* elements identified in our previous study. Correspondence of species  
30 names as in Fig. 3. c) *Copia* lineages relative frequencies in species involved in HT.

1 **Supplemental Figure 1:** Sequence identity distribution of the assembled BUSCO genes in  
2 the studied species. These sequence identities were obtained by Blastn alignment. N:  
3 corresponds to the total number of BUSCO genes that can be aligned at the nucleic level  
4 between each pair of species. HS threshold calculated by INTERCHANGE using the  
5 following formula :  $HS = (Q3+IQR/2)$ , the inter-quartile range  $IQR = Q3-Q1$  (Q1 and Q3  
6 correspond to the first and third quartile respectively). The age in millions of years (Mya)  
7 represents the divergence time between species according to Timetree.org. Correspondence of  
8 species names: Ace: *Acer monspessulanum*, Aln: *Alnus glutinosa*, Bry: *Bryonia dioica*, Dio:  
9 *Dioscorea communis*, Fag: *Fagus sylvatica*, Fra: *Fraxinus excelsior*, Fom: *Fomes*  
10 *fomentarius*, Gen: *Genista pilosa*, Hed: *Hedera helix*, Her: *Hericium clathroides*, Lon:  
11 *Lonicera periclymenum*, Ple: *Pleurotus ostreatus*, Pru: *Prunus avium*, Rub: *Rubus ulmifolius*,  
12 Sal: *Salvia sp*, Sen: *Senecio inaequendis*, Sor: *Sorbus aria*.

13 **Supplemental Figure 2-13:** Phylogenetic tree of the horizontally transferred LTR-  
14 retrotransposons constructed using all homologous elements from 400 plant species. MaCo01  
15 to MaCo11 correspond to the transferred Copia superfamily and MaGy01 to the Gypsy  
16 superfamily. Nodes supported with bootstrap values above 70% are indicated with a black dot.  
17 Nodes with bootstrap values under 70% are indicated with white dot.

18 **Supplemental Figure 14-25:** Patchy distribution of the horizontally transferred LTR-  
19 retrotransposons in the phylogenetic tree of 400 plant species. MaCo01 to MaCo11  
20 correspond to the transferred Copia superfamily and MaGy01 to the Gypsy superfamily. The  
21 green bars represent the species harboring the LTR family and their height the relative  
22 abundance in the host genome.

23 **Supplemental Figure 26-27:** PCR validation of the transferred LTRs MaCo01 to MaCo11  
24 and MaGy01. The red arrows indicate the primers designed to amplify different regions of the  
25 transferred LTRs in the species involved in the HTs. For each species, PCR was performed  
26 using DNA from two different individuals, different from those used for genome sequencing,  
27 to limit possible contamination.

28 **Supplemental Figure 28 :** Graphical visualisation of Blastn alignment of transferred LTRs-  
29 retrotransposons (Maco2) identified and assembled using INTERCHANGE pipeline against  
30 Nanopore reads of two *Hedera helix* genomes corresponding to two ivy individuals A and B.  
31 Visual representation was achieved using <http://kablammo.wasmuthlab.org/> software.



1 **Supplemental Figure 29:** Graphical visualisation of Blastn alignment of two transferred  
2 LTRs-retrotransposons (Maco3 and Maco11) identified and assembled using  
3 INTERCHANGE pipeline against Nanopore reads of *Fagus sylvatica* genome. Visual  
4 representation was achieved using <http://kablammo.wasmuthlab.org/> software.

5 **Supplemental Table 1 :** List of five plant species used as control data and their  
6 corresponding sequence read archive IDs used as input in INTERCHANGE.

7 **Supplemental Table 2 :** List of HT candidates detected by INTERCHANGE between the  
8 five species listed in Supplemental Table 1.

9 **Supplemental Table 3 :** List of species sequenced in the frame of this study and their  
10 BioSample IDs.

11 **Supplemental Table 4 :** List of HT candidates detected (MaCo1 to MaCo11 and MaGy01)  
12 between the 17 studied species. In green candidates meeting the HS, PI and PD criteria. In  
13 gray candidates meeting only the HS criteria.

14 **Supplemental Table 5 :** List of 400 plant species in which homologs of the transferred LTRs  
15 were screened.

16 **Supplemental Table 6 :** Primers used for PCR validation of transferred LTRs. For each  
17 candidate, two sets of primers were designed and labeled P1 and P2 (see Supplemental Figure  
18 26 and 27).

19 **Supplemental Table 7 :** List of the 12 transferred LTRs, their size and copy number  
20 estimated from the unassembled genomes and from the reference genome when available.

## 21 **References**

- 22 1. Wiedenbeck J, Cohan FM. Origins of bacterial diversity through horizontal genetic transfer and  
23 adaptation to new ecological niches. *FEMS Microbiology Reviews*. 2011;35:957–76.
- 24 2. Davies J. Inactivation of antibiotics and the dissemination of resistance genes. *Science*.  
25 1994;264:375–82.
- 26 3. Keeling PJ, Palmer JD. Horizontal gene transfer in eukaryotic evolution. *Nature Reviews Genetics*.  
27 2008;9:605–18.
- 28 4. Boto L. Horizontal gene transfer in the acquisition of novel traits by metazoans. *Proceedings of the*  
29 *Royal Society B: Biological Sciences* [Internet]. 2014;281:20132450. Available from:  
30 <https://royalsocietypublishing.org/doi/10.1098/rspb.2013.2450>
- 31 5. Soucy SM, Huang J, Gogarten JP. Horizontal gene transfer: Building the web of life. *Nature*  
32 *Reviews Genetics* [Internet]. Nature Publishing Group; 2015;16:472–82. Available from:  
33 <http://dx.doi.org/10.1038/nrg3962>

1

2

- 1 6. Sibbald SJ, Eme L, Archibald JM, Roger AJ. Lateral Gene Transfer Mechanisms and Pan-genomes  
2 in Eukaryotes. *Trends in Parasitology* [Internet]. 2020;36:927–41. Available from:  
3 <https://linkinghub.elsevier.com/retrieve/pii/S1471492220301975>
- 4 7. Van Etten J, Bhattacharya D. Horizontal Gene Transfer in Eukaryotes: Not if, but How Much?  
5 *Trends in Genetics* [Internet]. 2020; Available from:  
6 <https://linkinghub.elsevier.com/retrieve/pii/S0168952520302067>
- 7 8. Chen R, Huangfu L, Lu Y, Fang H, Xu Y, Li P, et al. Adaptive innovation of green plants by  
8 horizontal gene transfer. *Biotechnology Advances* [Internet]. 2021;46:107671. Available from:  
9 <https://linkinghub.elsevier.com/retrieve/pii/S0734975020301737>
- 10 9. El Baidouri M, Carpentier M-C, Cooke R, Gao D, Lasserre E, Llauro C, et al. Widespread and  
11 frequent horizontal transfers of transposable elements in plants. *Genome Research* [Internet].  
12 2014;24:831–8. Available from: <http://genome.cshlp.org/lookup/doi/10.1101/gr.164400.113>
- 13 10. Peccoud J, Loiseau V, Cordaux R, Gilbert C. Massive horizontal transfer of transposable elements  
14 in insects. *Proceedings of the National Academy of Sciences* [Internet]. 2017;114:4721–6. Available  
15 from: <http://www.pnas.org/lookup/doi/10.1073/pnas.1621178114>
- 16 11. Dunning LT, Olofsson JK, Parisod C, Choudhury RR, Moreno-Villena JJ, Yang Y, et al. Lateral  
17 transfers of large DNA fragments spread functional genes among grasses. *Proceedings of the National*  
18 *Academy of Sciences* [Internet]. 2019;201810031. Available from:  
19 <http://www.pnas.org/lookup/doi/10.1073/pnas.1810031116>
- 20 12. Zhang H-H, Peccoud J, Xu M-R-X, Zhang X-G, Gilbert C. Horizontal transfer and evolution of  
21 transposable elements in vertebrates. *Nature Communications* [Internet]. 2020;11:1362. Available  
22 from: <http://www.nature.com/articles/s41467-020-15149-4>
- 23 13. Christin PA, Edwards EJ, Besnard G, Boxall SF, Gregory R, Kellogg EA, et al. Adaptive evolution  
24 of C 4 photosynthesis through recurrent lateral gene transfer. *Current Biology* [Internet]. Elsevier Ltd;  
25 2012;22:445–9. Available from: <http://dx.doi.org/10.1016/j.cub.2012.01.054>
- 26 14. Graham LA, Li J, Davidson WS, Davies PL. Smelt was the likely beneficiary of an antifreeze gene  
27 laterally transferred between fishes. *BMC Evolutionary Biology* [Internet]. *BMC Evolutionary*  
28 *Biology*; 2012;12:190. Available from: *BMC Evolutionary Biology*
- 29 15. Yue J, Hu X, Sun H, Yang Y, Huang J. Widespread impact of horizontal gene transfer on plant  
30 colonization of land. *Nature Communications* [Internet]. Nature Publishing Group; 2012;3:1152.  
31 Available from: <http://dx.doi.org/10.1038/ncomms2148>
- 32 16. Li FW, Villarreal JC, Kelly S, Rothfels CJ, Melkonian M, Frangedakis E, et al. Horizontal transfer  
33 of an adaptive chimeric photoreceptor from bryophytes to ferns. *Proceedings of the National Academy*  
34 *of Sciences of the United States of America*. 2014;111:6672–7.
- 35 17. Wang H, Sun S, Ge W, Zhao L, Hou B, Wang K, et al. Horizontal gene transfer of Fhb7 from  
36 fungus underlies Fusarium head blight resistance in wheat. *Science* [Internet]. 2020;eaba5435.  
37 Available from: <https://www.sciencemag.org/lookup/doi/10.1126/science.aba5435>
- 38 18. Xia J, Guo Z, Yang Z, Han H, Wang S, Xu H, et al. Whitefly hijacks a plant detoxification gene  
39 that neutralizes plant toxins. *Cell* [Internet]. Elsevier Inc.; 2021;1–13. Available from:  
40 <https://doi.org/10.1016/j.cell.2021.02.014>
- 41 19. Yang Z, Zhang Y, Wafula EK, Honaas LA, Ralph PE, Jones S, et al. Horizontal gene transfer is  
42 more frequent with increased heterotrophy and contributes to parasite adaptation. *Proceedings of the*  
43 *National Academy of Sciences of the United States of America*. 2016;113:E7010–9.
- 44 20. Yoshida S, Maruyama S, Nozaki H, Shirasu K. Horizontal gene transfer by the parasitic plant  
45 *striga hermonthica*. *Science*. 2010;328:1128.

- 1 21. Yang Z, Wafula EK, Kim G, Shahid S, McNeal JR, Ralph PE, et al. Convergent horizontal gene  
2 transfer and cross-talk of mobile nucleic acids in parasitic plants. *Nature Plants* [Internet]. Springer  
3 US; 2019; Available from: <http://www.nature.com/articles/s41477-019-0458-0>
- 4 22. Davis CC. Host-to-Parasite Gene Transfer in Flowering Plants: Phylogenetic Evidence from  
5 Malpighiales. *Science* [Internet]. 2004;305:676–8. Available from:  
6 <https://www.sciencemag.org/lookup/doi/10.1126/science.1100671>
- 7 23. Xi Z, Bradley RK, Wurdack KJ, Wong KM, Sugumaran M, Bomblies K, et al. Horizontal transfer  
8 of expressed genes in a parasitic flowering plant. *BMC Genomics* [Internet]. 2012;13:227. Available  
9 from: <http://bmcbgenomics.biomedcentral.com/articles/10.1186/1471-2164-13-227>
- 10 24. Gilbert C, Schaack S, Pace II JK, Brindley PJ, Feschotte C. A role for host–parasite interactions in  
11 the horizontal transfer of transposons across phyla. *Nature* [Internet]. 2010;464:1347–50. Available  
12 from: <http://www.nature.com/articles/nature08939>
- 13 25. Stegemann S, Bock R. Exchange of Genetic Material. *Science*. 2009;649.
- 14 26. Fuentes I, Stegemann S, Golczyk H, Karcher D, Bock R. Horizontal genome transfer as an asexual  
15 path to the formation of new species. *Nature*. 2014;511:232–5.
- 16 27. Hibdige SGS, Raimondeau P, Christin P-A, Dunning LT. Widespread lateral gene transfer among  
17 grasses. *New Phytologist* [Internet]. 2021;230:2474–86. Available from:  
18 <https://onlinelibrary.wiley.com/doi/10.1111/nph.17328>
- 19 28. Magri D. Patterns of post-glacial spread and the extent of glacial refugia of European beech (*Fagus*  
20 *sylvatica*). *Journal of Biogeography* [Internet]. 2008;35:450–63. Available from:  
21 <http://doi.wiley.com/10.1111/j.1365-2699.2007.01803.x>
- 22 29. Aubin E, El Baidouri M, Panaud O. Horizontal Gene Transfers in Plants. *Life* [Internet].  
23 2021;11:857. Available from: <https://www.mdpi.com/2075-1729/11/8/857>
- 24 30. Wallau GL, Ortiz MF, Loreto ELS. Horizontal Transposon Transfer in Eukarya: Detection, Bias,  
25 and Perspectives. *Genome Biology and Evolution* [Internet]. 2012;4:801–11. Available from:  
26 <https://academic.oup.com/gbe/article-lookup/doi/10.1093/gbe/evs055>
- 27 31. Ellinghaus D, Kurtz S, Willhoeft U. LTRharvest, an efficient and flexible software for de novo  
28 detection of LTR retrotransposons. *BMC Bioinformatics*. 2008;9.
- 29 32. Miele V, Penel S, Duret L. Ultra-fast sequence clustering from similarity networks with SiLiX.  
30 *BMC Bioinformatics* [Internet]. 2011;12:116. Available from:  
31 <https://bmcbioinformatics.biomedcentral.com/articles/10.1186/1471-2105-12-116>
- 32 33. Ma J, Bennetzen JL. Rapid recent growth and divergence of rice nuclear genomes. *Proceedings of*  
33 *the National Academy of Sciences* [Internet]. 2004;101:12404–10. Available from:  
34 <http://www.pnas.org/cgi/doi/10.1073/pnas.0403715101>
- 35 34. Neumann P, Novák P, Hošťáková N, Macas J. Systematic survey of plant LTR-retrotransposons  
36 elucidates phylogenetic relationships of their polyprotein domains and provides a reference for  
37 element classification. *Mobile DNA* [Internet]. 2019;10:1. Available from:  
38 <https://mobilednajournal.biomedcentral.com/articles/10.1186/s13100-018-0144-1>
- 39 35. Buchfink B, Xie C, Huson DH. Fast and sensitive protein alignment using DIAMOND. *Nature*  
40 *Methods* [Internet]. Nature Publishing Group; 2015;12:59–60. Available from:  
41 <http://dx.doi.org/10.1038/nmeth.3176>
- 42 36. Xi Z, Wang Y, Bradley RK, Sugumaran M, Marx CJ, Rest JS, et al. Massive Mitochondrial Gene  
43 Transfer in a Parasitic Flowering Plant Clade. *PLoS Genetics*. 2013;9:1–10.
- 44 37. Kim G, LeBlanc ML, Wafula EK, DePamphilis CW, Westwood JH. Genomic-scale exchange of

- 1 mRNA between a parasitic plant and its hosts. *Science* [Internet]. 2014;345:808–11. Available from:  
2 <https://www.sciencemag.org/lookup/doi/10.1126/science.1253122>
- 3 38. Leclercq S, Thézé J, Chebbi MA, Giraud I, Moumen B, Ernenwein L, et al. Birth of a W sex  
4 chromosome by horizontal transfer of Wolbachia bacterial symbiont genome. *Proceedings of the*  
5 *National Academy of Sciences of the United States of America*. 2016;113:15036–41.
- 6 39. Richards TA, Soanes DM, Foster PG, Leonard G, Thornton CR, Talbot NJ. Phylogenomic  
7 Analysis Demonstrates a Pattern of Rare and Ancient Horizontal Gene Transfer between Plants and  
8 Fungi. *The Plant Cell* [Internet]. 2009;21:1897–911. Available from:  
9 <https://academic.oup.com/plcell/article/21/7/1897/6095451>
- 10 40. Park M, Sarkhosh A, Tsoleva V, El-Sharkawy I. Horizontal Transfer of LTR Retrotransposons  
11 Contributes to the Genome Diversity of Vitis. *International Journal of Molecular Sciences* [Internet].  
12 2021;22:10446. Available from: <https://www.mdpi.com/1422-0067/22/19/10446>
- 13 41. Lanciano S, Carpentier MC, Llauro C, Jobet E, Robakowska-Hyzorek D, Lasserre E, et al.  
14 Sequencing the extrachromosomal circular mobilome reveals retrotransposon activity in plants. *PLoS*  
15 *Genetics*. 2017;13:1–20.
- 16 42. Lee SC, Ernst E, Berube B, Borges F, Parent J-S, Ledon P, et al. Arabidopsis LTR  
17 retrotransposons and their regulation by epigenetically activated small RNA. 2020;576–88.
- 18 43. Sabot F, Schulman AH. Parasitism and the retrotransposon life cycle in plants : a hitchhiker ' s  
19 guide to the genome. 2006;381–8.
- 20 44. Lee SC, Martienssen RA. Regulation of retrotransposition in Arabidopsis. *Biochemical Society*  
21 *Transactions* [Internet]. 2021;49:2241–51. Available from:  
22 [https://portlandpress.com/biochemsoctrans/article/49/5/2241/229743/Regulation-of-retrotransposition-](https://portlandpress.com/biochemsoctrans/article/49/5/2241/229743/Regulation-of-retrotransposition-in-Arabidopsis)  
23 [in-Arabidopsis](https://portlandpress.com/biochemsoctrans/article/49/5/2241/229743/Regulation-of-retrotransposition-in-Arabidopsis)
- 24 45. Baduel P, Leduque B, Ignace A, Gy I, Gil J, Loudet O, et al. Genetic and environmental  
25 modulation of transposition shapes the evolutionary potential of Arabidopsis thaliana. *Genome*  
26 *Biology* [Internet]. 2021;22:138. Available from:  
27 <https://genomebiology.biomedcentral.com/articles/10.1186/s13059-021-02348-5>
- 28 46. Grandbastien M-A. LTR retrotransposons, handy hitchhikers of plant regulation and stress  
29 response. *Biochimica et Biophysica Acta (BBA) - Gene Regulatory Mechanisms* [Internet].  
30 2015;1849:403–16. Available from: <https://linkinghub.elsevier.com/retrieve/pii/S1874939914002053>
- 31 47. Wicker T, Keller B. Genome-wide comparative analysis of copia retrotransposons in Triticeae,  
32 rice, and Arabidopsis reveals conserved ancient evolutionary lineages and distinct dynamics of  
33 individual copia families. *Genome Research* [Internet]. 2007;17:1072–81. Available from:  
34 <http://genome.cshlp.org/lookup/doi/10.1101/gr.6214107>
- 35 48. Wos G, Choudhury RR, Kolář F, Parisod C. Transcriptional activity of transposable elements  
36 along an elevational gradient in Arabidopsis arenosa. *Mobile DNA* [Internet]. 2021;12:7. Available  
37 from: <https://mobilednajournal.biomedcentral.com/articles/10.1186/s13100-021-00236-0>
- 38 49. Mirouze M, Reinders J, Bucher E, Nishimura T, Schneeberger K, Ossowski S, et al. Selective  
39 epigenetic control of retrotransposition in Arabidopsis. *Nature* [Internet]. 2009;461:427–30. Available  
40 from: <http://www.nature.com/articles/nature08328>
- 41 50. Ito H, Gaubert H, Bucher E, Mirouze M, Vaillant I, Paszkowski J. An siRNA pathway prevents  
42 transgenerational retrotransposition in plants subjected to stress. *Nature* [Internet]. 2011;472:115–9.  
43 Available from: <http://www.nature.com/articles/nature09861>
- 44 51. Marí-Ordóñez A, Marchais A, Etcheverry M, Martin A, Colot V, Voinnet O. Reconstructing de  
45 novo silencing of an active plant retrotransposon. *Nature Genetics* [Internet]. 2013;45:1029–39.

- 1 Available from: <http://www.nature.com/articles/ng.2703>
- 2 52. Debladis E, Llauro C, Carpentier M-C, Mirouze M, Panaud O. Detection of active transposable  
3 elements in *Arabidopsis thaliana* using Oxford Nanopore Sequencing technology. *BMC Genomics*  
4 [Internet]. 2017;18:537. Available from:  
5 <http://bmcgenomics.biomedcentral.com/articles/10.1186/s12864-017-3753-z>
- 6 53. Pushkova E., Beniaminov A., Krasnov G., Novakovskiy R., Povkhova N., Melnikova N., et al.  
7 Extraction of high-molecular-weight DNA from poplar plants for Nanopore sequencing. *Plant genetic*  
8 *resources for breeding and producing functional nutraceutical food* [Internet]. Institute of Cytology  
9 and Genetics, Siberian Branch of the Russian Academy of Sciences Novosibirsk State University;  
10 2019. p. 158–60. Available from: <http://publ.icgbio.ru/wp-content/uploads/2019/10/158-160.pdf>
- 11 54. Kurtz S, Narechania A, Stein JC, Ware D. A new method to compute K-mer frequencies and its  
12 application to annotate large repetitive plant genomes. *BMC genomics*. 2008;9:517.
- 13 55. Schmieder R, Edwards R. Quality control and preprocessing of metagenomic datasets.  
14 *Bioinformatics* [Internet]. 2011;27:863–4. Available from:  
15 <https://academic.oup.com/bioinformatics/article-lookup/doi/10.1093/bioinformatics/btr026>
- 16 56. Prjibelski A, Antipov D, Meleshko D, Lapidus A, Korobeynikov A. Using SPAdes De Novo  
17 Assembler. *Current Protocols in Bioinformatics* [Internet]. 2020;70. Available from:  
18 <https://onlinelibrary.wiley.com/doi/abs/10.1002/cpbi.102>
- 19 57. Ouyang S. The TIGR Plant Repeat Databases: a collective resource for the identification of  
20 repetitive sequences in plants. *Nucleic Acids Research* [Internet]. 2004;32:360D – 363. Available  
21 from: <https://academic.oup.com/nar/article-lookup/doi/10.1093/nar/gkh099>
- 22 58. Li H. Minimap2: pairwise alignment for nucleotide sequences. Birol I, editor. *Bioinformatics*  
23 [Internet]. 2018;34:3094–100. Available from:  
24 <https://academic.oup.com/bioinformatics/article/34/18/3094/4994778>
- 25 59. Katoh K, Standley DM. MAFFT Multiple Sequence Alignment Software Version 7:  
26 Improvements in Performance and Usability. *Molecular Biology and Evolution* [Internet].  
27 2013;30:772–80. Available from:  
28 <https://academic.oup.com/mbe/article-lookup/doi/10.1093/molbev/mst010>
- 29 60. Capella-Gutierrez S, Silla-Martinez JM, Gabaldon T. trimAl: a tool for automated alignment  
30 trimming in large-scale phylogenetic analyses. *Bioinformatics* [Internet]. 2009;25:1972–3. Available  
31 from: <https://academic.oup.com/bioinformatics/article-lookup/doi/10.1093/bioinformatics/btp348>
- 32 61. Price MN, Dehal PS, Arkin AP. FastTree: Computing Large Minimum Evolution Trees with  
33 Profiles instead of a Distance Matrix. *Molecular Biology and Evolution* [Internet]. 2009;26:1641–50.  
34 Available from: <https://academic.oup.com/mbe/article-lookup/doi/10.1093/molbev/msp077>
- 35 62. Zhang C, Rabiee M, Sayyari E, Mirarab S. ASTRAL-III: polynomial time species tree  
36 reconstruction from partially resolved gene trees. *BMC Bioinformatics* [Internet]. 2018;19:153.  
37 Available from: <https://bmcbioinformatics.biomedcentral.com/articles/10.1186/s12859-018-2129-y>
- 38 63. Moore RM, Harrison AO, McAllister SM, Polson SW, Wommack KE. Iroki: automatic  
39 customization and visualization of phylogenetic trees. *PeerJ* [Internet]. 2020;8:e8584. Available from:  
40 <https://peerj.com/articles/8584>

41

42

43

1

2

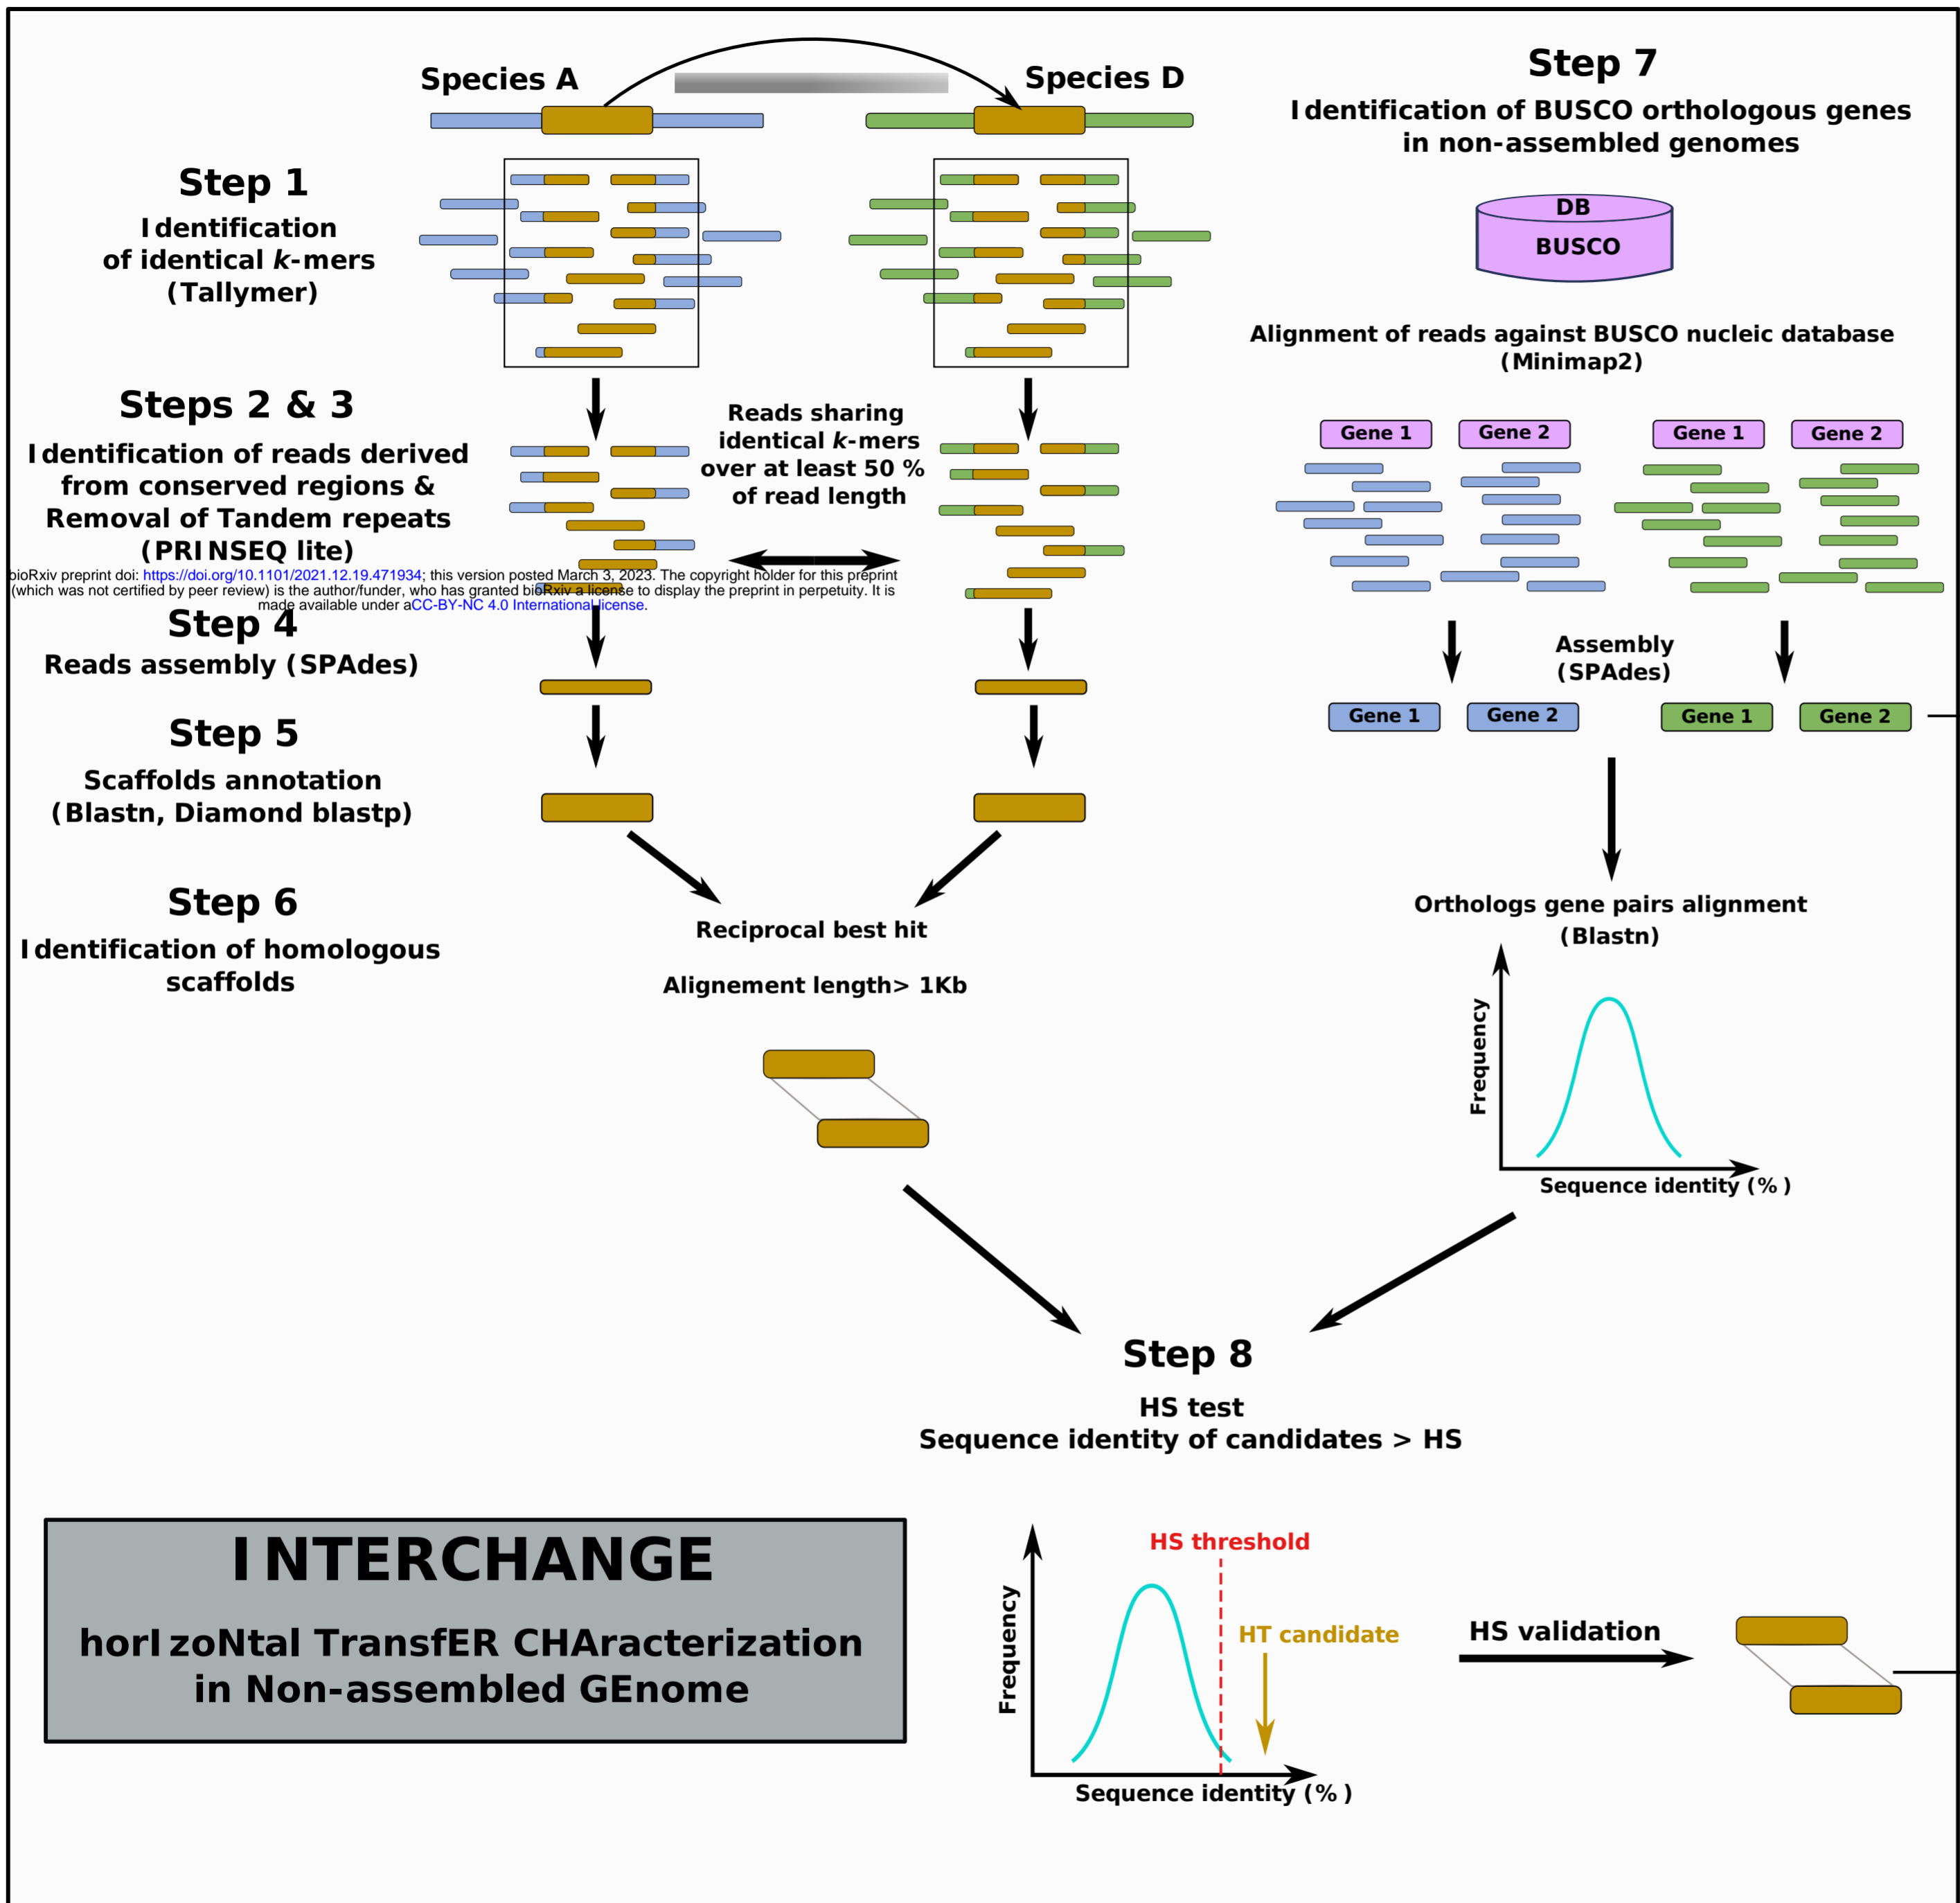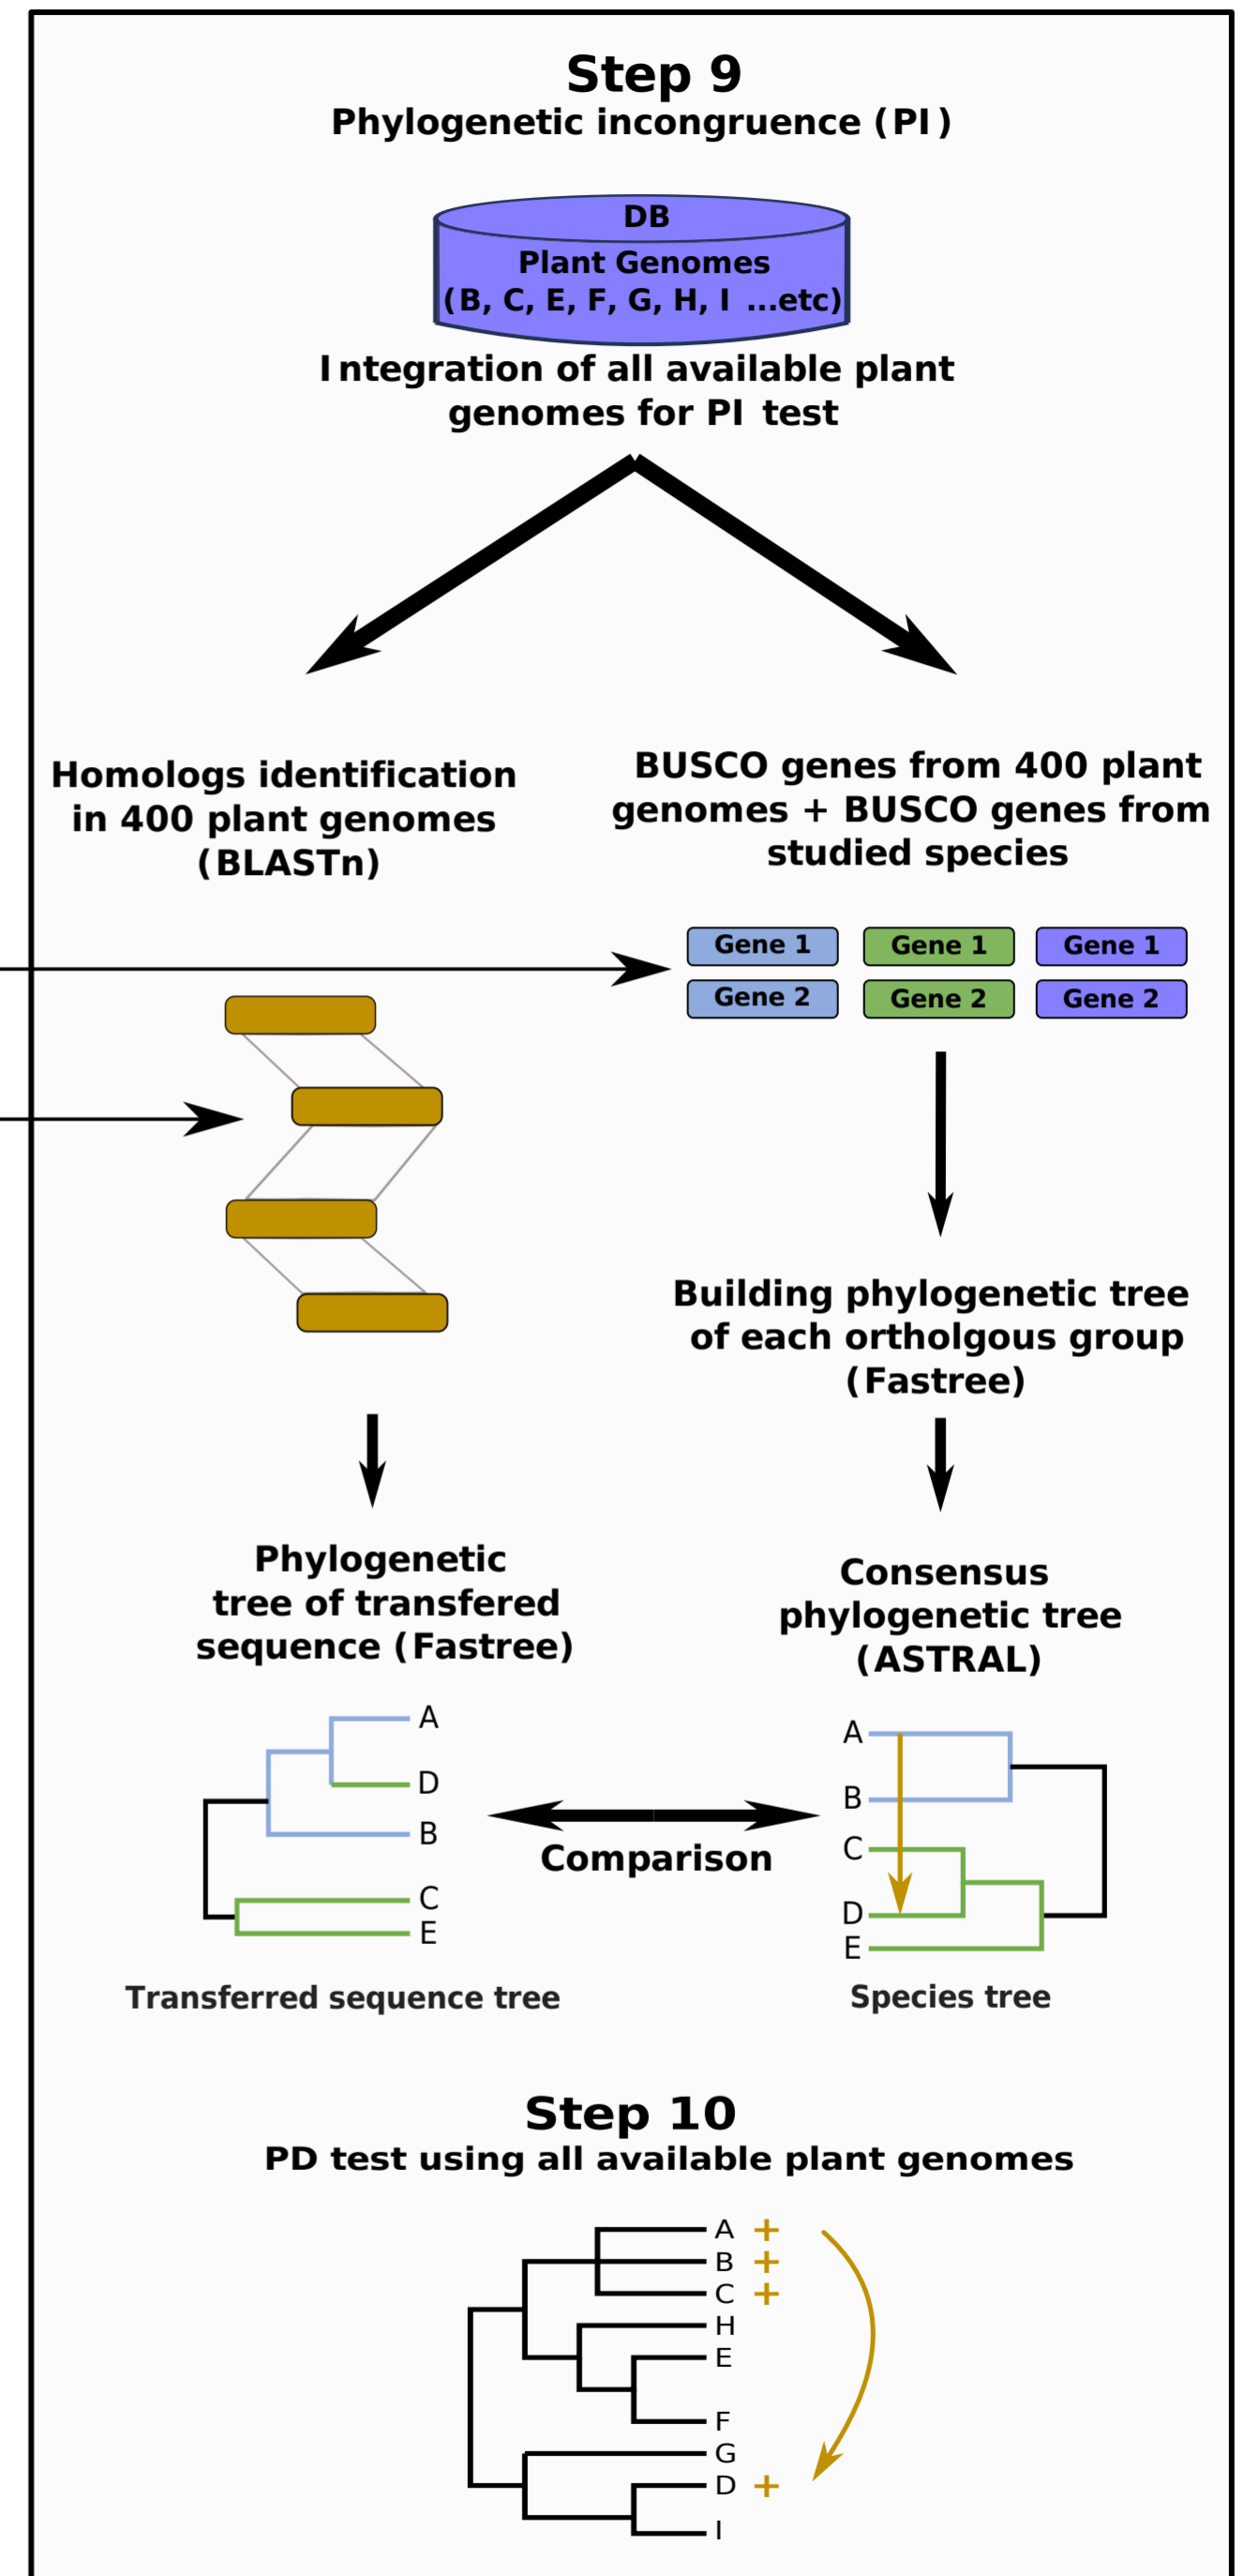

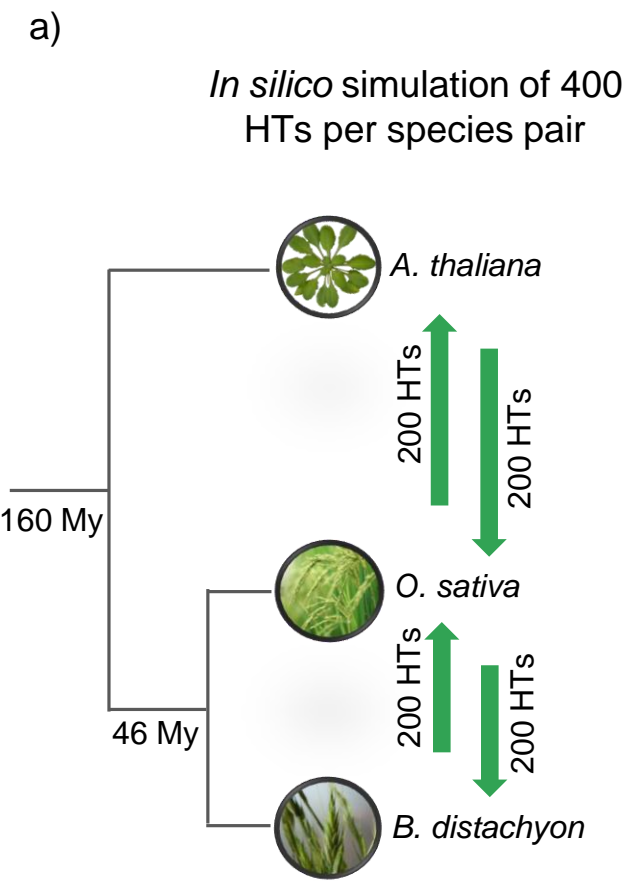

HTs identification using INTERCHANGE

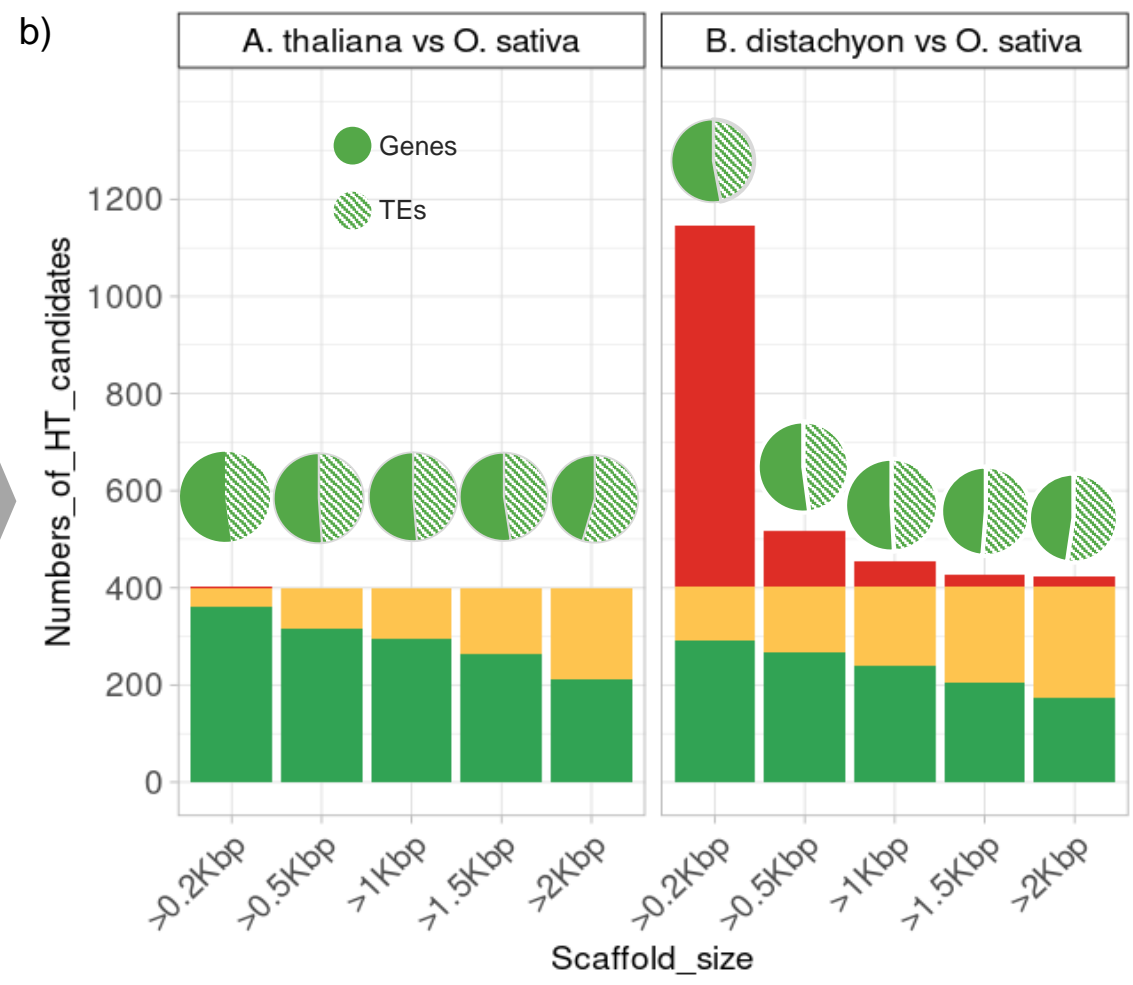

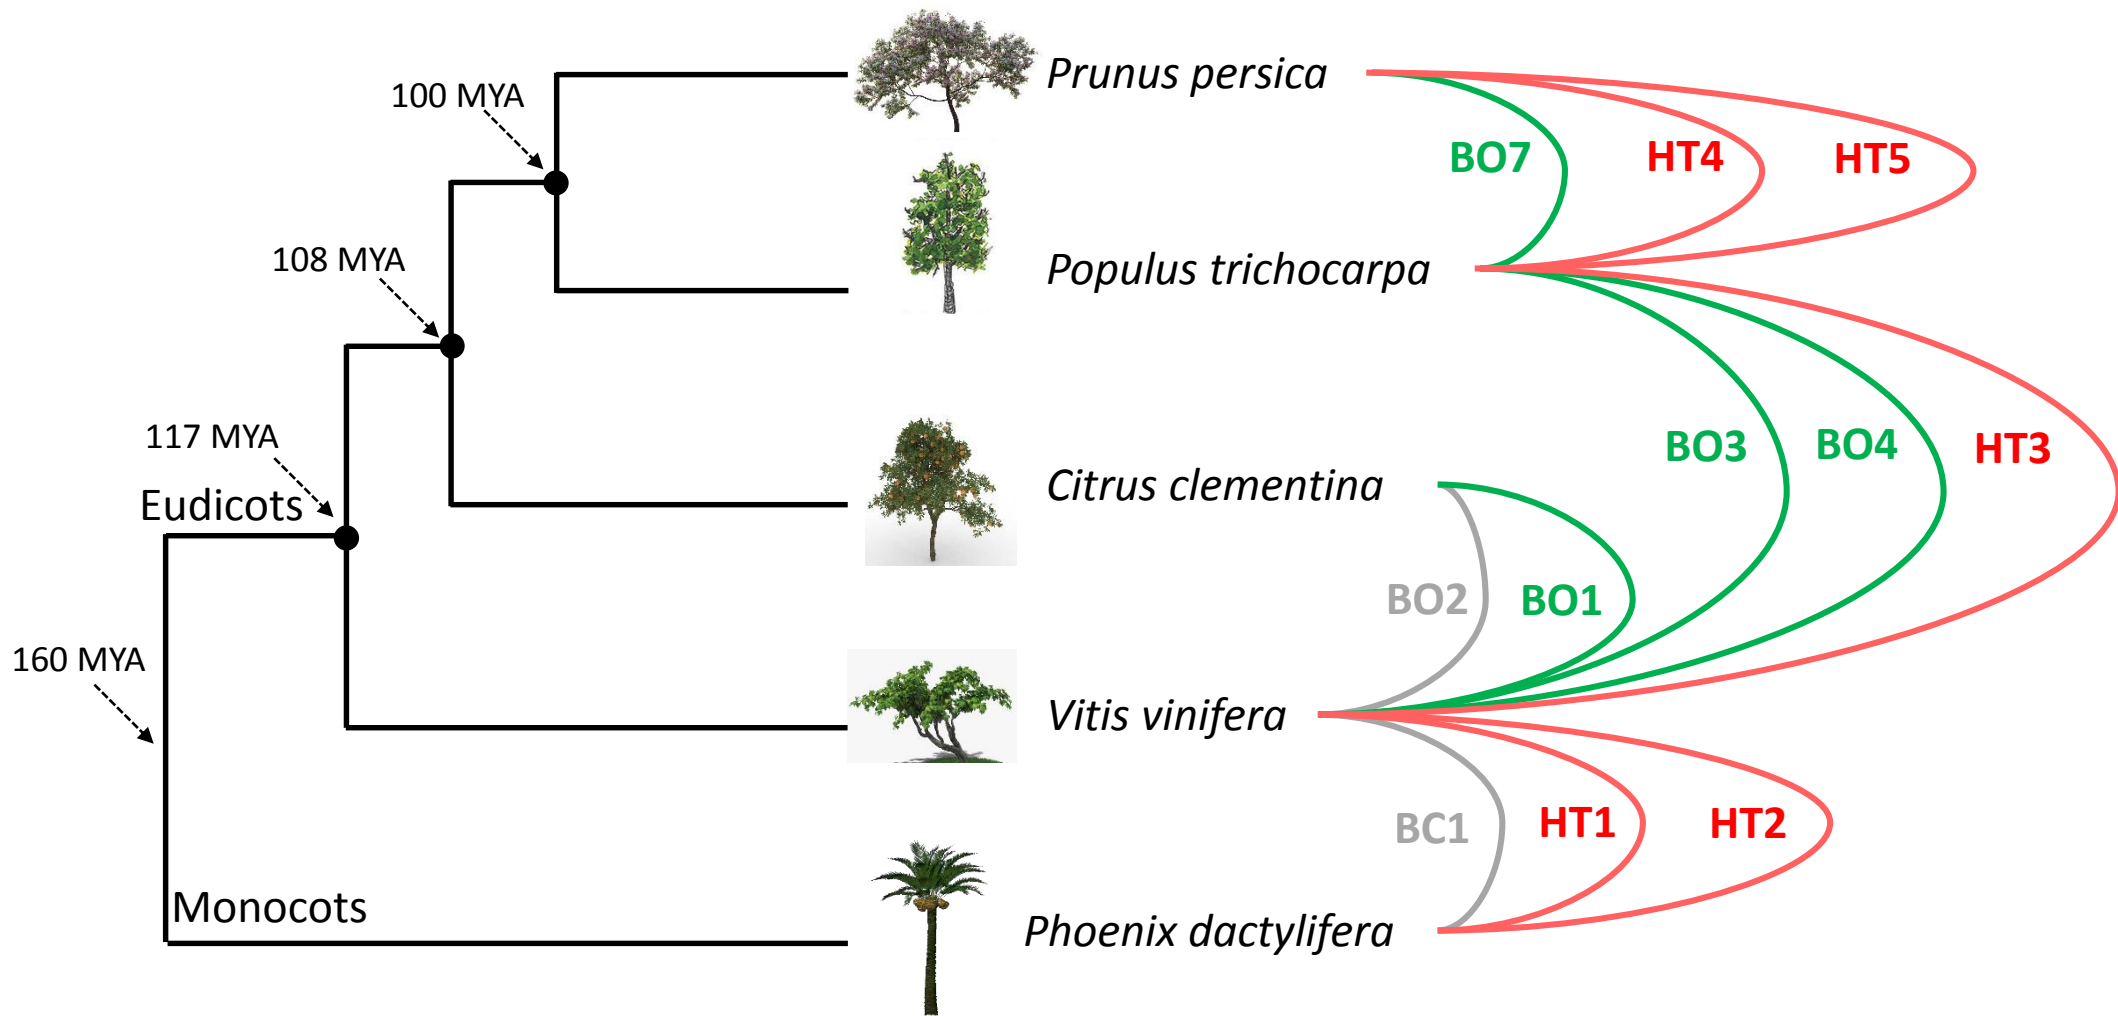





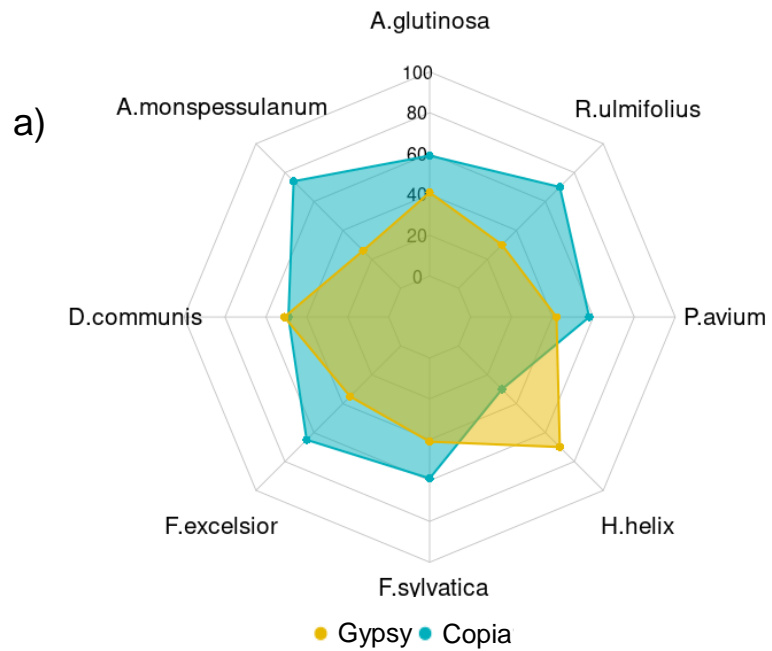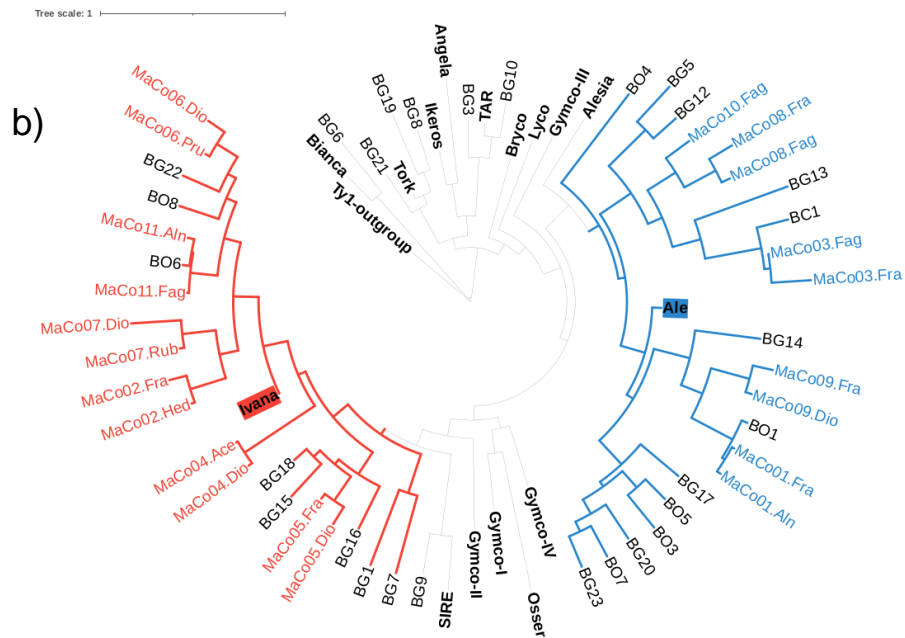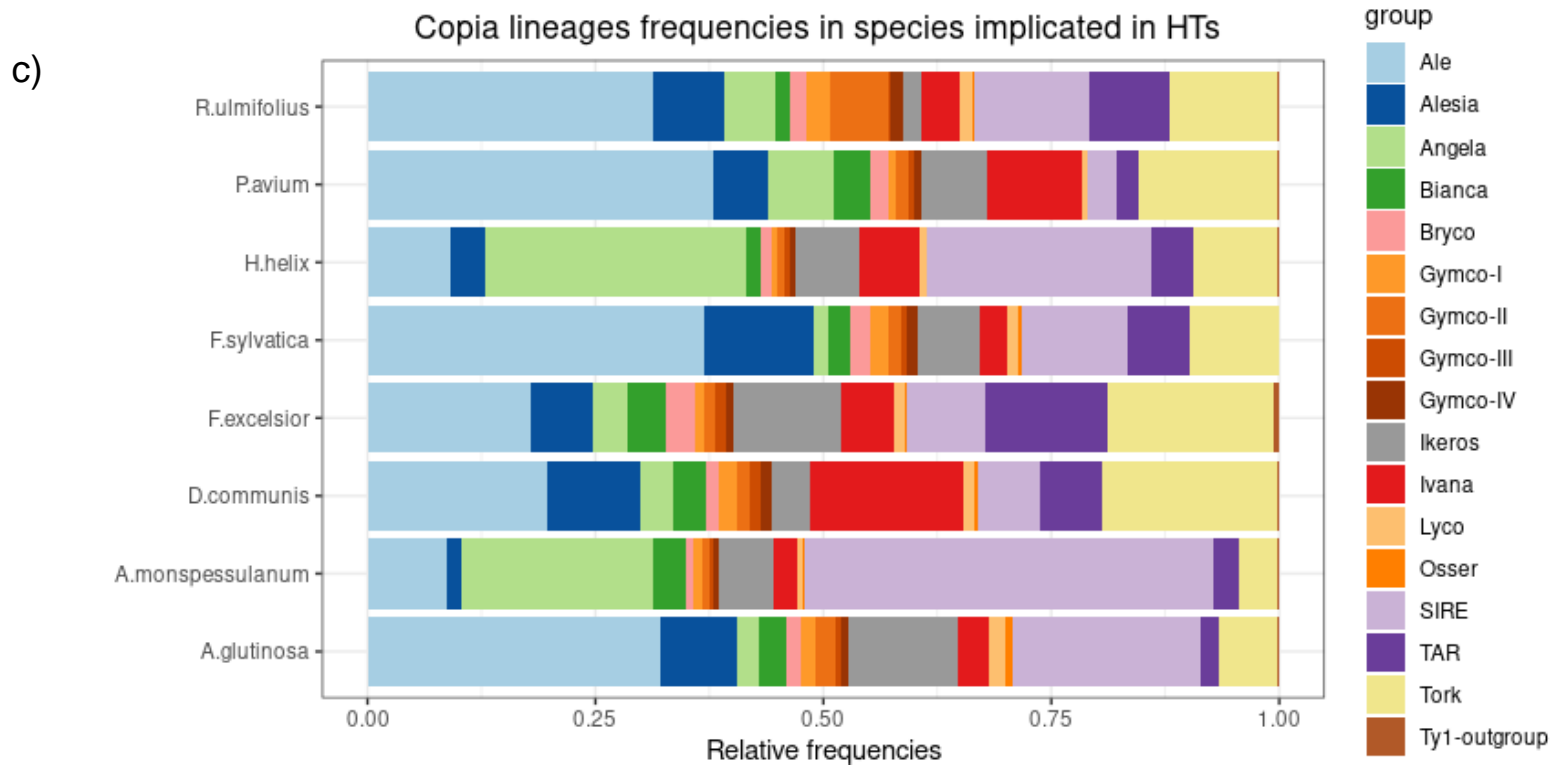

Source: https://www.biorxiv.org/content/10.1101/2021.12.19.471934v3.full.pdf
